# Supplementary material
Source: publisher figshare collection journal article supplement (https://gsajournals.figshare.com/articles/dataset/_/14462430)
Supplement: Supplementary file 1 [file 1]

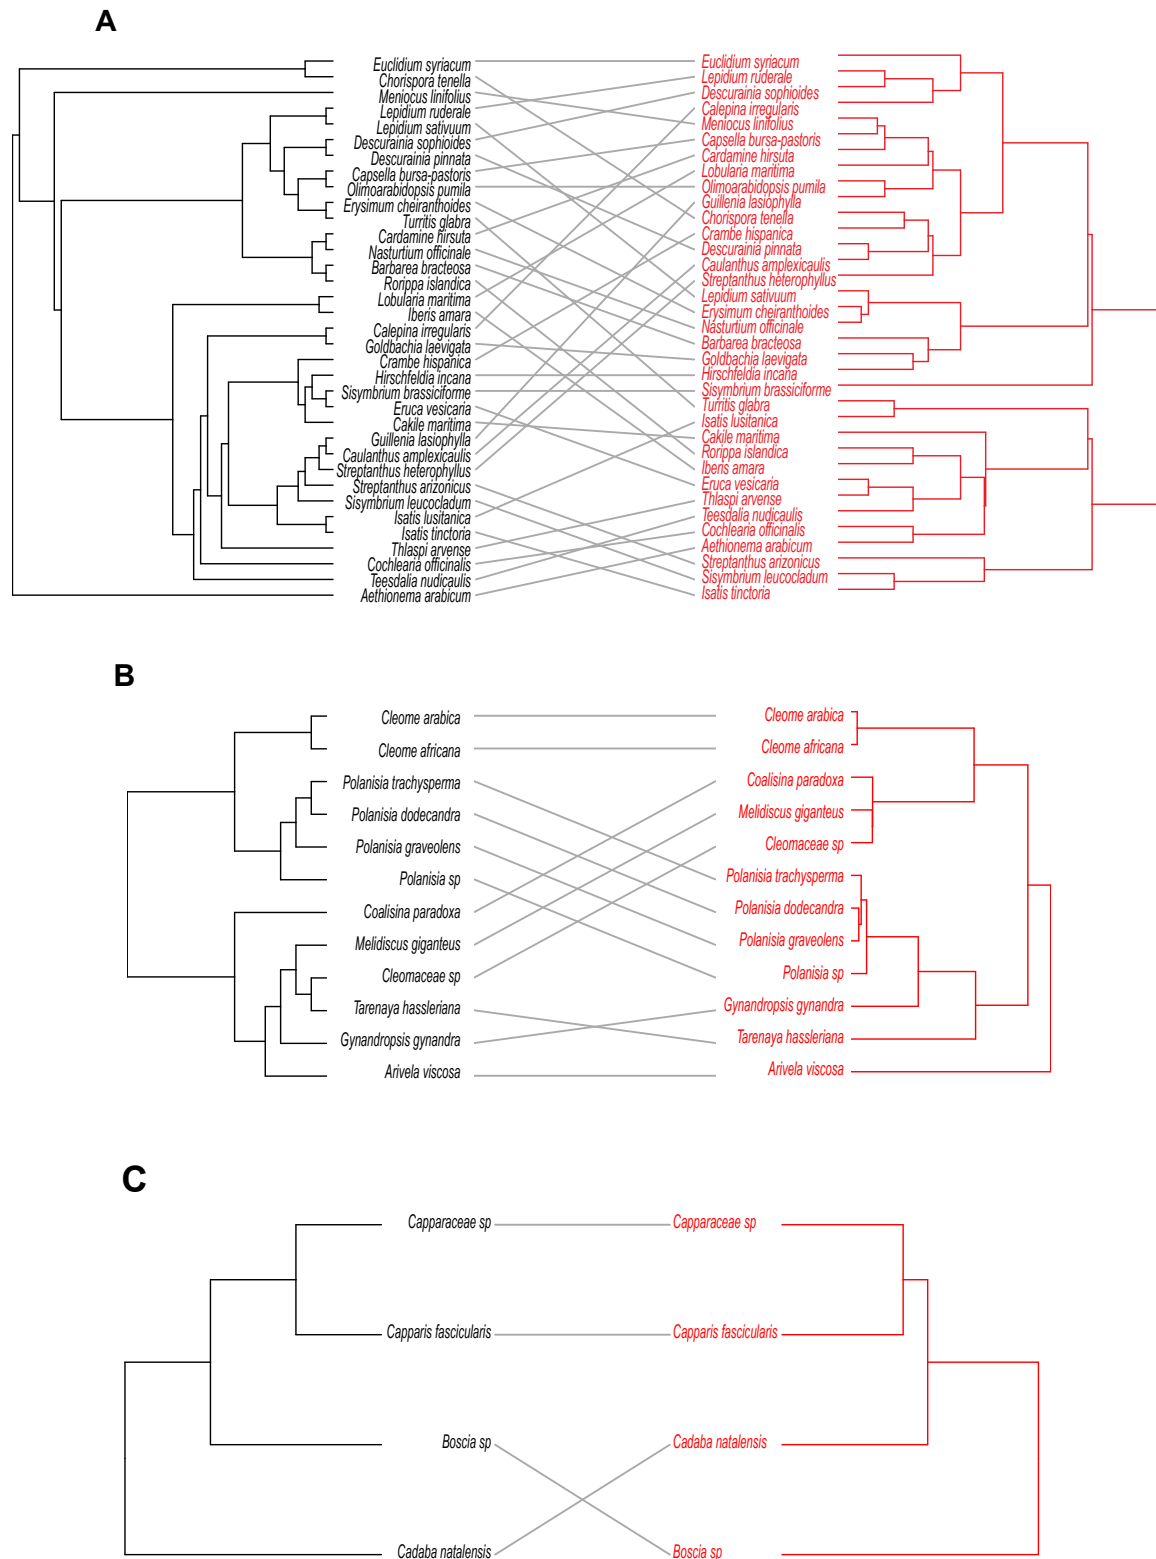

**Supplemental Figure 13.** Comparison of phylogenetic relationships in the ASTRAL tree obtained from transcriptome data (black) and based on hierarchical clustering of TE abundances (red) for 20% sampling effort of genome wide coverage in (A) Brassicaceae, (B) Cleomaceae, and (C) Capparaceae.
