# Supplementary material
Source: publisher figshare collection journal article supplement (https://gsajournals.figshare.com/articles/dataset/_/14462430)
Supplement: Supplementary file 2 [file 1]

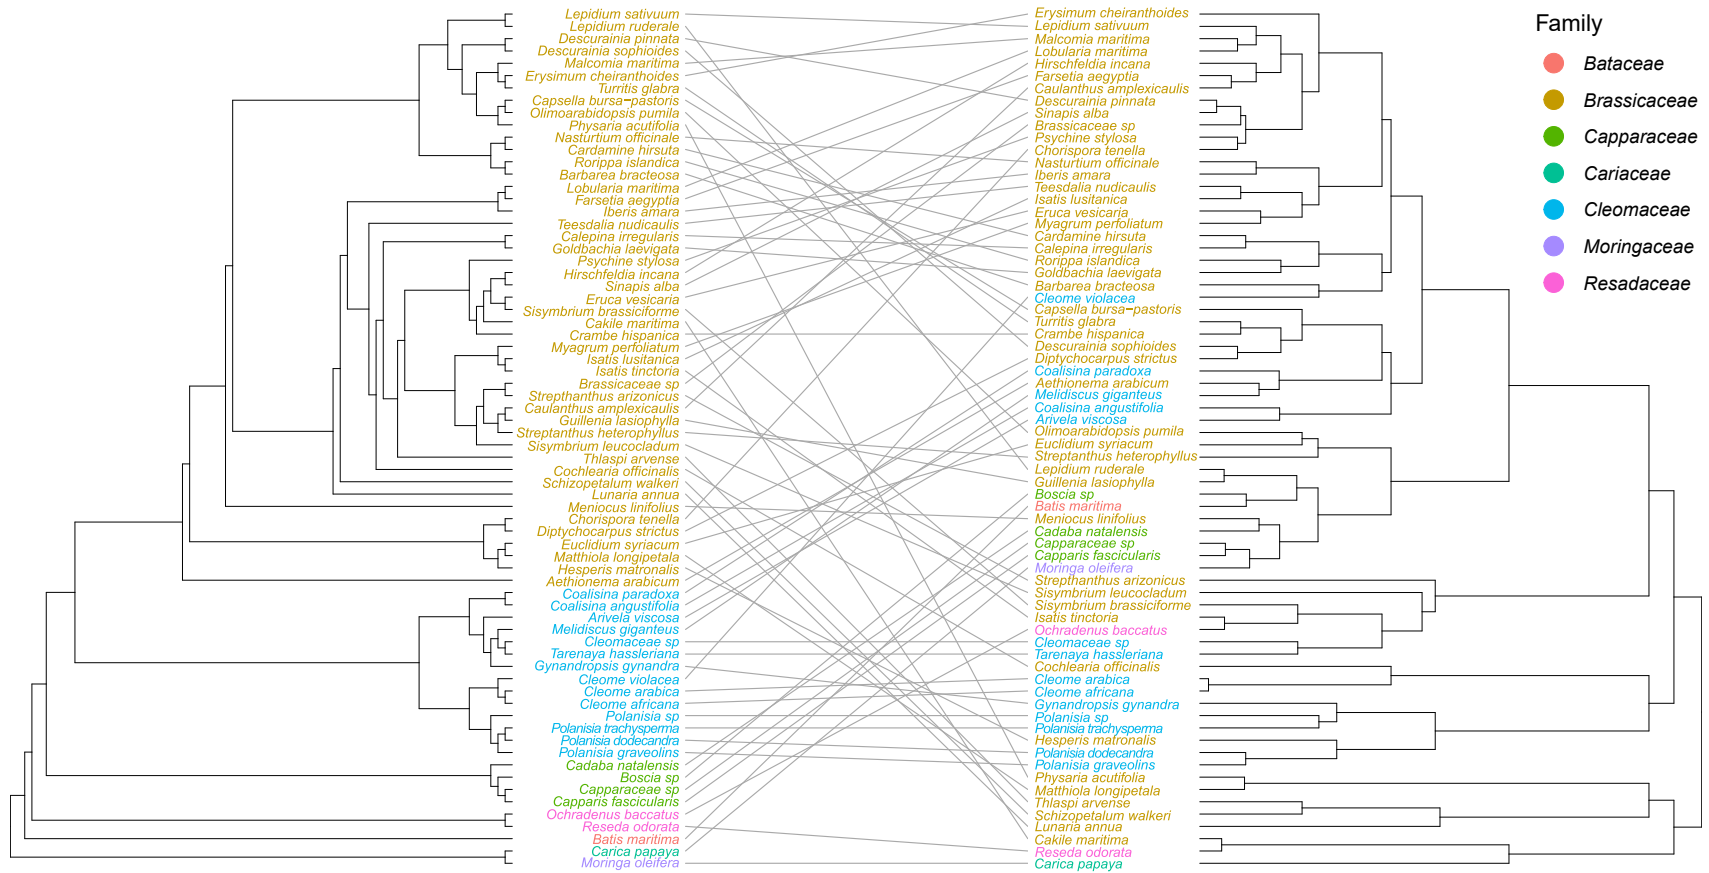

**Supplemental Figure 10.** Comparison of phylogenetic relationships across Brassicales in the ASTRAL tree obtained from transcriptome data (left) and based on hierarchical clustering of TE abundances (right).
