# Supplementary material
Source: publisher figshare collection journal article supplement (https://gsajournals.figshare.com/articles/dataset/_/14462430)
Supplement: Supplementary file 4 [file 1]

**Supplemental Table 4.** Taxon sampling with genome size, previously published chromosome counts, and repetitive element abundance for 20% sampling effort of genome wide coverage. Chromosome counts as in <http://legacy.tropicos.org/Project/IPCN>. Asterisks (\*) indicate samples with known ploidy level.

| Family       | Species                           | Genome Size<br>(Mbp/IC) | Chromosome count<br>(n) | Copia % | Gypsy % | Harbinger % | hAT % | Helitron % | L1 % | MuDR % | other DNA<br>transposon % | other ltr<br>retrotransposon % | other non-ltr<br>retrotransposon % | Penelope % | SINE2/tRNA % | Novosib % | RTE % | RTEX % | Randl % | Total_RE % |
|--------------|-----------------------------------|-------------------------|-------------------------|---------|---------|-------------|-------|------------|------|--------|---------------------------|--------------------------------|------------------------------------|------------|--------------|-----------|-------|--------|---------|------------|
| Bataceae     | <i>Batis maritima</i>             | 356.97                  | 11                      | 0.07    | 0.12    | 0.00        | 0.02  | 0.07       | 0.01 | 0.05   | 0.01                      | 0.00                           | 0.00                               | 0.00       | 0.00         | 0.00      | 0.00  | 0.00   | 0.00    | 0.35       |
| Brassicaceae | <i>Aethionema arabicum</i> *      | 933.99                  | 11                      | 0.18    | 0.22    | 0.02        | 0.03  | 0.10       | 0.02 | 0.14   | 0.02                      | 0.02                           | 0.00                               | 0.00       | 0.00         | 0.00      | 0.00  | 0.00   | 0.00    | 0.74       |
| Brassicaceae | <i>Meniocus linifolius</i>        | 899.76                  | -                       | 0.12    | 0.18    | 0.01        | 0.02  | 0.08       | 0.01 | 0.10   | 0.01                      | 0.00                           | 0.00                               | 0.00       | 0.00         | 0.00      | 0.00  | 0.00   | 0.00    | 0.54       |
| Brassicaceae | <i>Barbarea bracteosa</i>         | 268.95                  | 8                       | 0.10    | 0.25    | 0.01        | 0.02  | 0.05       | 0.01 | 0.04   | 0.01                      | 0.00                           | 0.00                               | 0.00       | 0.00         | 0.00      | 0.00  | 0.00   | 0.00    | 0.49       |
| Brassicaceae | <i>Cakile maritima</i> *          | 1383.87                 | 9                       | 0.19    | 0.39    | 0.02        | 0.01  | 0.03       | 0.01 | 0.06   | 0.01                      | 0.00                           | 0.00                               | 0.00       | 0.02         | 0.00      | 0.00  | 0.00   | 0.00    | 0.74       |
| Brassicaceae | <i>Calepina irregularis</i>       | 254.28                  | 14                      | 0.09    | 0.18    | 0.01        | 0.02  | 0.04       | 0.01 | 0.04   | 0.01                      | 0.00                           | 0.00                               | 0.00       | 0.00         | 0.00      | 0.00  | 0.00   | 0.00    | 0.39       |
| Brassicaceae | <i>Capsella bursa-pastoris</i>    | 420.54                  | 8,16                    | 0.12    | 0.17    | 0.02        | 0.03  | 0.06       | 0.01 | 0.07   | 0.02                      | 0.01                           | 0.00                               | 0.00       | 0.00         | 0.00      | 0.00  | 0.00   | 0.00    | 0.51       |
| Brassicaceae | <i>Cardamine hirsuta</i>          | 489                     | 7,8                     | 0.09    | 0.20    | 0.02        | 0.02  | 0.11       | 0.01 | 0.07   | 0.01                      | 0.00                           | 0.00                               | 0.00       | 0.00         | 0.00      | 0.00  | 0.00   | 0.00    | 0.52       |
| Brassicaceae | <i>Caulanthus amplexicaulis</i> * | 484.11                  | -                       | 0.16    | 0.19    | 0.01        | 0.02  | 0.04       | 0.01 | 0.06   | 0.01                      | 0.00                           | 0.00                               | 0.00       | 0.00         | 0.00      | 0.00  | 0.00   | 0.00    | 0.49       |
| Brassicaceae | <i>Chorispora tenella</i>         | 366.75                  | 7                       | 0.19    | 0.16    | 0.01        | 0.02  | 0.05       | 0.02 | 0.06   | 0.01                      | 0.00                           | 0.00                               | 0.00       | 0.00         | 0.00      | 0.00  | 0.00   | 0.00    | 0.51       |
| Brassicaceae | <i>Cochlearia officinalis</i>     | 735                     | 12                      | 0.21    | 0.28    | 0.01        | 0.03  | 0.07       | 0.01 | 0.08   | 0.01                      | 0.00                           | 0.00                               | 0.00       | 0.00         | 0.00      | 0.00  | 0.00   | 0.00    | 0.72       |
| Brassicaceae | <i>Crambe hispanica</i> *         | 660.15                  | 15,30                   | 0.23    | 0.17    | 0.01        | 0.01  | 0.04       | 0.01 | 0.06   | 0.01                      | 0.00                           | 0.00                               | 0.00       | 0.00         | 0.00      | 0.00  | 0.00   | 0.00    | 0.55       |
| Brassicaceae | <i>Descurainia pinnata</i> *      | 371.64                  | 7                       | 0.19    | 0.19    | 0.01        | 0.01  | 0.04       | 0.00 | 0.04   | 0.00                      | 0.00                           | 0.00                               | 0.00       | 0.00         | 0.00      | 0.00  | 0.00   | 0.00    | 0.49       |
| Brassicaceae | <i>Descurainia sophioides</i> *   | 195.6                   | 7,14                    | 0.13    | 0.12    | 0.01        | 0.01  | 0.06       | 0.00 | 0.03   | 0.00                      | 0.00                           | 0.00                               | 0.00       | 0.00         | 0.00      | 0.00  | 0.00   | 0.00    | 0.36       |
| Brassicaceae | <i>Eruca vesicaria</i> *          | 709.05                  | 11                      | 0.17    | 0.28    | 0.01        | 0.01  | 0.05       | 0.01 | 0.06   | 0.01                      | 0.00                           | 0.00                               | 0.00       | 0.01         | 0.00      | 0.00  | 0.00   | 0.00    | 0.61       |
| Brassicaceae | <i>Erysimum cheiranthoides</i>    | 813.4                   | 8                       | 0.16    | 0.23    | 0.01        | 0.02  | 0.04       | 0.01 | 0.03   | 0.02                      | 0.01                           | 0.00                               | 0.00       | 0.00         | 0.00      | 0.00  | 0.00   | 0.00    | 0.54       |
| Brassicaceae | <i>Euclidium syriacum</i> *       | 298.29                  | 7                       | 0.15    | 0.12    | 0.01        | 0.01  | 0.06       | 0.00 | 0.05   | 0.01                      | 0.00                           | 0.00                               | 0.00       | 0.00         | 0.00      | 0.00  | 0.00   | 0.00    | 0.41       |
| Brassicaceae | <i>Goldbachia laevigata</i>       | 547.68                  | 14                      | 0.11    | 0.28    | 0.01        | 0.02  | 0.03       | 0.01 | 0.05   | 0.01                      | 0.00                           | 0.00                               | 0.00       | 0.00         | 0.00      | 0.00  | 0.00   | 0.00    | 0.53       |
| Brassicaceae | <i>Guillenia lasiophylla</i>      | 621.03                  | -                       | 0.11    | 0.12    | 0.02        | 0.02  | 0.11       | 0.01 | 0.08   | 0.01                      | 0.00                           | 0.00                               | 0.00       | 0.00         | 0.00      | 0.00  | 0.00   | 0.00    | 0.48       |
| Brassicaceae | <i>Hirschfeldia incana</i>        | 552.57                  | 7                       | 0.13    | 0.22    | 0.01        | 0.01  | 0.06       | 0.01 | 0.07   | 0.01                      | 0.00                           | 0.00                               | 0.00       | 0.01         | 0.00      | 0.00  | 0.00   | 0.00    | 0.52       |
| Brassicaceae | <i>Iberis amara</i> *             | 831.3                   | 7                       | 0.13    | 0.23    | 0.02        | 0.02  | 0.11       | 0.01 | 0.11   | 0.01                      | 0.00                           | 0.00                               | 0.00       | 0.00         | 0.00      | 0.00  | 0.00   | 0.00    | 0.63       |
| Brassicaceae | <i>Isatis lusitanica</i>          | 381.42                  | 14                      | 0.20    | 0.21    | 0.00        | 0.01  | 0.06       | 0.01 | 0.04   | 0.01                      | 0.02                           | 0.00                               | 0.00       | 0.00         | 0.00      | 0.00  | 0.00   | 0.00    | 0.57       |
| Brassicaceae | <i>Isatis tinctoria</i> *         | 616.14                  | 8,16                    | 0.27    | 0.18    | 0.01        | 0.02  | 0.04       | 0.01 | 0.03   | 0.01                      | 0.00                           | 0.00                               | 0.00       | 0.00         | 0.00      | 0.00  | 0.00   | 0.00    | 0.58       |
| Brassicaceae | <i>Lepidium ruderale</i>          | 371.64                  | 12,16                   | 0.10    | 0.10    | 0.02        | 0.02  | 0.06       | 0.00 | 0.08   | 0.01                      | 0.00                           | 0.00                               | 0.00       | 0.00         | 0.00      | 0.00  | 0.00   | 0.00    | 0.39       |
| Brassicaceae | <i>Lepidium sativuum</i> *        | 591.69                  | 12                      | 0.17    | 0.22    | 0.03        | 0.02  | 0.04       | 0.00 | 0.06   | 0.01                      | 0.00                           | 0.00                               | 0.00       | 0.00         | 0.00      | 0.00  | 0.00   | 0.00    | 0.55       |

|              |                                   |         |       |      |      |      |      |      |      |      |      |      |      |      |      |      |      |      |      |      |
|--------------|-----------------------------------|---------|-------|------|------|------|------|------|------|------|------|------|------|------|------|------|------|------|------|------|
| Brassicaceae | <i>Lobularia maritima</i>         | 312.96  | 15    | 0.11 | 0.18 | 0.01 | 0.02 | 0.05 | 0.04 | 0.04 | 0.01 | 0.00 | 0.00 | 0.01 | 0.00 | 0.00 | 0.00 | 0.00 | 0.00 | 0.49 |
| Brassicaceae | <i>Nasturtium officinale</i>      | 430.32  | 15    | 0.16 | 0.21 | 0.01 | 0.02 | 0.05 | 0.03 | 0.05 | 0.01 | 0.01 | 0.00 | 0.00 | 0.00 | 0.00 | 0.00 | 0.00 | 0.00 | 0.56 |
| Brassicaceae | <i>Olimoarabidopsis pumila</i>    | 410.76  | 5     | 0.14 | 0.13 | 0.01 | 0.02 | 0.08 | 0.01 | 0.04 | 0.02 | 0.01 | 0.00 | 0.00 | 0.00 | 0.00 | 0.00 | 0.00 | 0.00 | 0.46 |
| Brassicaceae | <i>Sisymbrium leucocladum</i>     | 498.78  | 8     | 0.30 | 0.19 | 0.01 | 0.01 | 0.03 | 0.01 | 0.04 | 0.01 | 0.01 | 0.00 | 0.00 | 0.00 | 0.00 | 0.00 | 0.00 | 0.00 | 0.60 |
| Brassicaceae | <i>Rorippa islandica*</i>         | 567.24  | 10    | 0.10 | 0.28 | 0.01 | 0.02 | 0.08 | 0.01 | 0.06 | 0.01 | 0.00 | 0.00 | 0.00 | 0.00 | 0.00 | 0.00 | 0.00 | 0.00 | 0.58 |
| Brassicaceae | <i>Sisymbrium brassiciforme</i>   | -       | 14    | 0.26 | 0.16 | 0.01 | 0.01 | 0.02 | 0.00 | 0.03 | 0.00 | 0.00 | 0.00 | 0.00 | 0.00 | 0.00 | 0.00 | 0.00 | 0.00 | 0.49 |
| Brassicaceae | <i>Streptanthus arizonicus</i>    | 1090.47 | -     | 0.38 | 0.19 | 0.01 | 0.01 | 0.03 | 0.01 | 0.04 | 0.01 | 0.00 | 0.00 | 0.00 | 0.00 | 0.00 | 0.00 | 0.00 | 0.00 | 0.69 |
| Brassicaceae | <i>Streptanthus heterophyllus</i> | 748.17  | 18    | 0.22 | 0.10 | 0.01 | 0.01 | 0.04 | 0.00 | 0.05 | 0.01 | 0.00 | 0.00 | 0.00 | 0.00 | 0.00 | 0.00 | 0.00 | 0.00 | 0.45 |
| Brassicaceae | <i>Teesdalia nudicaulis</i>       | 557.46  | 7     | 0.18 | 0.23 | 0.01 | 0.02 | 0.07 | 0.01 | 0.07 | 0.01 | 0.00 | 0.00 | 0.00 | 0.00 | 0.00 | 0.00 | 0.00 | 0.00 | 0.61 |
| Brassicaceae | <i>Thlaspi arvense*</i>           | 205.38  | 6     | 0.18 | 0.30 | 0.01 | 0.01 | 0.08 | 0.00 | 0.02 | 0.00 | 0.00 | 0.00 | 0.00 | 0.00 | 0.00 | 0.00 | 0.00 | 0.00 | 0.60 |
| Brassicaceae | <i>Turritis glabra</i>            | 919.32  | -     | 0.22 | 0.20 | 0.01 | 0.02 | 0.04 | 0.01 | 0.06 | 0.03 | 0.01 | 0.00 | 0.00 | 0.01 | 0.00 | 0.00 | 0.00 | 0.00 | 0.62 |
| Capparaceae  | <i>Boscia sp</i>                  | 410.76  | -     | 0.04 | 0.15 | 0.01 | 0.02 | 0.07 | 0.01 | 0.08 | 0.01 | 0.01 | 0.00 | 0.00 | 0.00 | 0.00 | 0.00 | 0.00 | 0.00 | 0.40 |
| Capparaceae  | <i>Cadaba natalensis</i>          | 259.17  | -     | 0.08 | 0.13 | 0.01 | 0.02 | 0.06 | 0.01 | 0.06 | 0.01 | 0.00 | 0.00 | 0.00 | 0.00 | 0.00 | 0.00 | 0.00 | 0.00 | 0.38 |
| Capparaceae  | <i>Capparis fascicularis</i>      | 1139.37 | -     | 0.09 | 0.18 | 0.01 | 0.03 | 0.09 | 0.01 | 0.12 | 0.02 | 0.01 | 0.00 | 0.00 | 0.00 | 0.00 | 0.00 | 0.00 | 0.00 | 0.57 |
| Capparaceae  | <i>Capparaceae sp</i>             | 611.25  | 9     | 0.07 | 0.16 | 0.01 | 0.03 | 0.08 | 0.01 | 0.10 | 0.02 | 0.01 | 0.00 | 0.00 | 0.00 | 0.00 | 0.00 | 0.00 | 0.00 | 0.48 |
| Cariaceae    | <i>Carica papaya</i>              | 392     | -     | 0.06 | 0.31 | 0.00 | 0.00 | 0.01 | 0.02 | 0.01 | 0.00 | 0.00 | 0.00 | 0.00 | 0.00 | 0.00 | 0.00 | 0.00 | 0.00 | 0.42 |
| Cleomaceae   | <i>Cleome africana</i>            | 484.11  | -     | 0.08 | 0.25 | 0.01 | 0.02 | 0.15 | 0.01 | 0.12 | 0.02 | 0.01 | 0.00 | 0.00 | 0.00 | 0.00 | 0.00 | 0.00 | 0.00 | 0.66 |
| Cleomaceae   | <i>Cleome arabica</i>             | 464.55  | -     | 0.09 | 0.24 | 0.01 | 0.02 | 0.15 | 0.01 | 0.12 | 0.02 | 0.01 | 0.00 | 0.00 | 0.00 | 0.00 | 0.00 | 0.00 | 0.00 | 0.66 |
| Cleomaceae   | <i>Polanisia sp</i>               | 709.05  | -     | 0.32 | 0.20 | 0.01 | 0.02 | 0.07 | 0.00 | 0.12 | 0.01 | 0.00 | 0.00 | 0.00 | 0.00 | 0.00 | 0.00 | 0.00 | 0.00 | 0.76 |
| Cleomaceae   | <i>Coalisisina paradoxa</i>       | 484.11  | -     | 0.16 | 0.13 | 0.01 | 0.04 | 0.08 | 0.01 | 0.14 | 0.03 | 0.00 | 0.00 | 0.00 | 0.00 | 0.00 | 0.00 | 0.00 | 0.00 | 0.60 |
| Cleomaceae   | <i>Cleomaceae sp</i>              | 322.74  | -     | 0.17 | 0.14 | 0.01 | 0.03 | 0.07 | 0.01 | 0.12 | 0.02 | 0.00 | 0.00 | 0.00 | 0.00 | 0.00 | 0.00 | 0.00 | 0.00 | 0.57 |
| Cleomaceae   | <i>Melidiscus giganteus</i>       | 420.54  | 10    | 0.14 | 0.14 | 0.01 | 0.04 | 0.09 | 0.01 | 0.14 | 0.02 | 0.00 | 0.00 | 0.00 | 0.00 | 0.00 | 0.00 | 0.00 | 0.00 | 0.61 |
| Cleomaceae   | <i>Arivela viscosa</i>            | 268.95  | 16,17 | 0.05 | 0.13 | 0.01 | 0.02 | 0.09 | 0.01 | 0.13 | 0.02 | 0.00 | 0.00 | 0.00 | 0.00 | 0.00 | 0.00 | 0.00 | 0.00 | 0.45 |
| Cleomaceae   | <i>Gynandropsis gynandra</i>      | 1124.7  | 17,18 | 0.24 | 0.31 | 0.01 | 0.02 | 0.06 | 0.01 | 0.08 | 0.02 | 0.00 | 0.00 | 0.00 | 0.00 | 0.00 | 0.00 | 0.00 | 0.00 | 0.73 |
| Cleomaceae   | <i>Polanisia dodecandra</i>       | 733.5   | 10    | 0.34 | 0.21 | 0.01 | 0.02 | 0.07 | 0.00 | 0.11 | 0.01 | 0.00 | 0.00 | 0.00 | 0.00 | 0.00 | 0.00 | 0.00 | 0.00 | 0.77 |
| Cleomaceae   | <i>Polanisia graveolens</i>       | 723.72  | -     | 0.34 | 0.22 | 0.01 | 0.02 | 0.06 | 0.00 | 0.10 | 0.01 | 0.00 | 0.00 | 0.00 | 0.00 | 0.00 | 0.00 | 0.00 | 0.00 | 0.77 |
| Cleomaceae   | <i>Polanisia trachysperma</i>     | 699.27  | 10    | 0.32 | 0.23 | 0.01 | 0.02 | 0.07 | 0.00 | 0.10 | 0.01 | 0.00 | 0.00 | 0.00 | 0.00 | 0.00 | 0.00 | 0.00 | 0.00 | 0.77 |
| Cleomaceae   | <i>Tarenaya hassleriana</i>       | 435.21  | 10    | 0.28 | 0.11 | 0.01 | 0.02 | 0.05 | 0.00 | 0.08 | 0.01 | 0.00 | 0.00 | 0.00 | 0.00 | 0.00 | 0.00 | 0.00 | 0.00 | 0.57 |
| Moringaceae  | <i>Moringa oleifera</i>           | 386.31  | 11    | 0.06 | 0.13 | 0.01 | 0.03 | 0.07 | 0.01 | 0.10 | 0.02 | 0.00 | 0.00 | 0.00 | 0.00 | 0.00 | 0.00 | 0.00 | 0.00 | 0.44 |
| Resadaceae   | <i>Ochradenus baccatus</i>        | 870.42  | 24,28 | 0.27 | 0.22 | 0.00 | 0.01 | 0.05 | 0.00 | 0.05 | 0.01 | 0.00 | 0.00 | 0.00 | 0.00 | 0.00 | 0.00 | 0.00 | 0.00 | 0.63 |
| Resadaceae   | <i>Reseda odorata</i>             | 498.78  | -     | 0.18 | 0.33 | 0.00 | 0.01 | 0.06 | 0.01 | 0.04 | 0.01 | 0.00 | 0.00 | 0.00 | 0.00 | 0.00 | 0.00 | 0.00 | 0.00 | 0.63 |
