# Supplementary material
Source: publisher figshare collection journal article supplement (https://gsajournals.figshare.com/articles/dataset/_/14462430)
Supplement: Supplementary file 5 [file 1]

**Supplemental Table 11.** OUwie weighted AICc scores for 20% sampling effort of genome wide coverage. Tests conducted are specified below as selection regime ~ modelled phenotype. BM1; single-rate Brownian motion, BMS; Brownian motion with different rate parameters for each state on a tree, OU1; Ornstein-Uhlenbeck model with a single optimum for all species, OUM; Ornstein-Uhlenbeck model with different state means and a single  $\alpha$  and  $\sigma^2$  acting all selective regimes, OUMV; Ornstein-Uhlenbeck model that assumes different state means as well as multiple  $\sigma^2$ , OUMA; Ornstein-Uhlenbeck model that assumes different state means as well as multiple  $\alpha$ , OUMVA; Ornstein-Uhlenbeck model that assumes different state means as well as multiple  $\alpha$  and  $\sigma^2$  per selective regime. The best models, as determined with AICc, are bolded and italicized. Asterisk (\*) indicated analyses which returned the warning, “You might not have enough data to fit this model well.” Analyses with plus (+) indicate those that are different from analyses using 500,000 reads for TE estimation.

| Simmap                                                                              | Test Conducted                       | BM1                            | BMS                            | OU1                            | OUM             | OUMV            | OUMA            | OUMVA                          |
|-------------------------------------------------------------------------------------|--------------------------------------|--------------------------------|--------------------------------|--------------------------------|-----------------|-----------------|-----------------|--------------------------------|
| 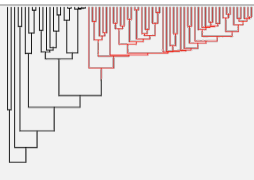   | AtAlpha/All ~ Total TE               | 0.0128139                      | 0.02218767                     | 0.27521355                     | 0.08918321      | 0.02781495      | 0.0361695       | <b><i>0.5366172</i></b><br>* + |
|                                                                                     | AtAlpha/All ~ Gypsy                  | 0.00208393                     | 0.00289653                     | <b><i>0.5560288</i></b>        | 0.21590307      | 0.06452161      | 0.06527786      | 0.0932882<br>*                 |
|                                                                                     | AtAlpha/All ~ Copia                  | 0.00429655                     | 0.00183176                     | <b><i>0.5006112</i></b>        | 0.21821271      | 0.08949653      | 0.07501245      | 0.11053881<br>*                |
|    | Brassicaceae/Brassicaceae ~ Total TE | 0.00482202                     | 0.00149545                     | <b><i>0.5847513</i></b>        | 0.25995552<br>* | 0.06677833<br>* | 0.06677347<br>* | 0.01542391<br>*                |
|                                                                                     | Brassicaceae/Brassicaceae ~ Gypsy    | 0.00275847                     | 0.00683213                     | <b><i>0.2690823</i></b>        | 0.25152818<br>* | 0.21180762<br>* | 0.2090873<br>*  | 0.04890403<br>*                |
|                                                                                     | Brassicaceae/Brassicaceae ~ Copia    | 0.00923169                     | 0.00299945                     | <b><i>0.6343302</i></b>        | 0.20416896<br>* | 0.06491571<br>* | 0.05980559<br>* | 0.02454847<br>*                |
|   | Neo/BMAP ~ Total RE                  | 0.13118789<br>*                | 0.04124829<br>*                | <b><i>0.7040983</i></b><br>* + | 0.08764229<br>* | 0.01543998<br>* | 0.01989543<br>* | 0.00048786<br>*                |
|                                                                                     | Neo/BMAP ~ Gypsy                     | 0.1344883<br>*                 | 0.02485949<br>*                | <b><i>0.7022896</i></b><br>* + | 0.11875475<br>* | 0.00915509<br>* | 0.0101874<br>*  | 0.00026543<br>*                |
|                                                                                     | Neo/BMAP ~ Copia                     | 0.03936127<br>*                | 0.00922431<br>*                | <b><i>0.8219309</i></b><br>*   | 0.10515527<br>* | 0.0139412<br>*  | 0.01006545<br>* | 0.00032163<br>*                |
|  | ThAlpha/Cleomaceae ~ Total RE        | 0.20692274<br>*                | <b><i>0.6870449</i></b><br>* + | 0.03308268<br>*                | 0.00645791<br>* | 0.00429031<br>* | 0.05947943<br>* | 0.002722<br>*                  |
|                                                                                     | ThAlpha/Cleomaceae ~ Gypsy           | <b><i>0.7275436</i></b><br>* + | 0.13426329<br>*                | 0.11631944<br>*                | 0.01975233<br>* | 0.00111915<br>* | 0.00098643<br>* | 0.00001577<br>*                |
|                                                                                     | ThAlpha/Cleomaceae ~ Copia           | <b><i>0.6390425</i></b><br>* + | 0.23818191<br>*                | 0.10308684<br>*                | 0.0151368<br>*  | 0.00153757<br>* | 0.00297874<br>* | 0.00003566<br>*                |
