# Supplementary material
Source: publisher figshare collection journal article supplement (https://gsajournals.figshare.com/articles/dataset/_/14462430)
Supplement: Supplementary file 7 [file 1]

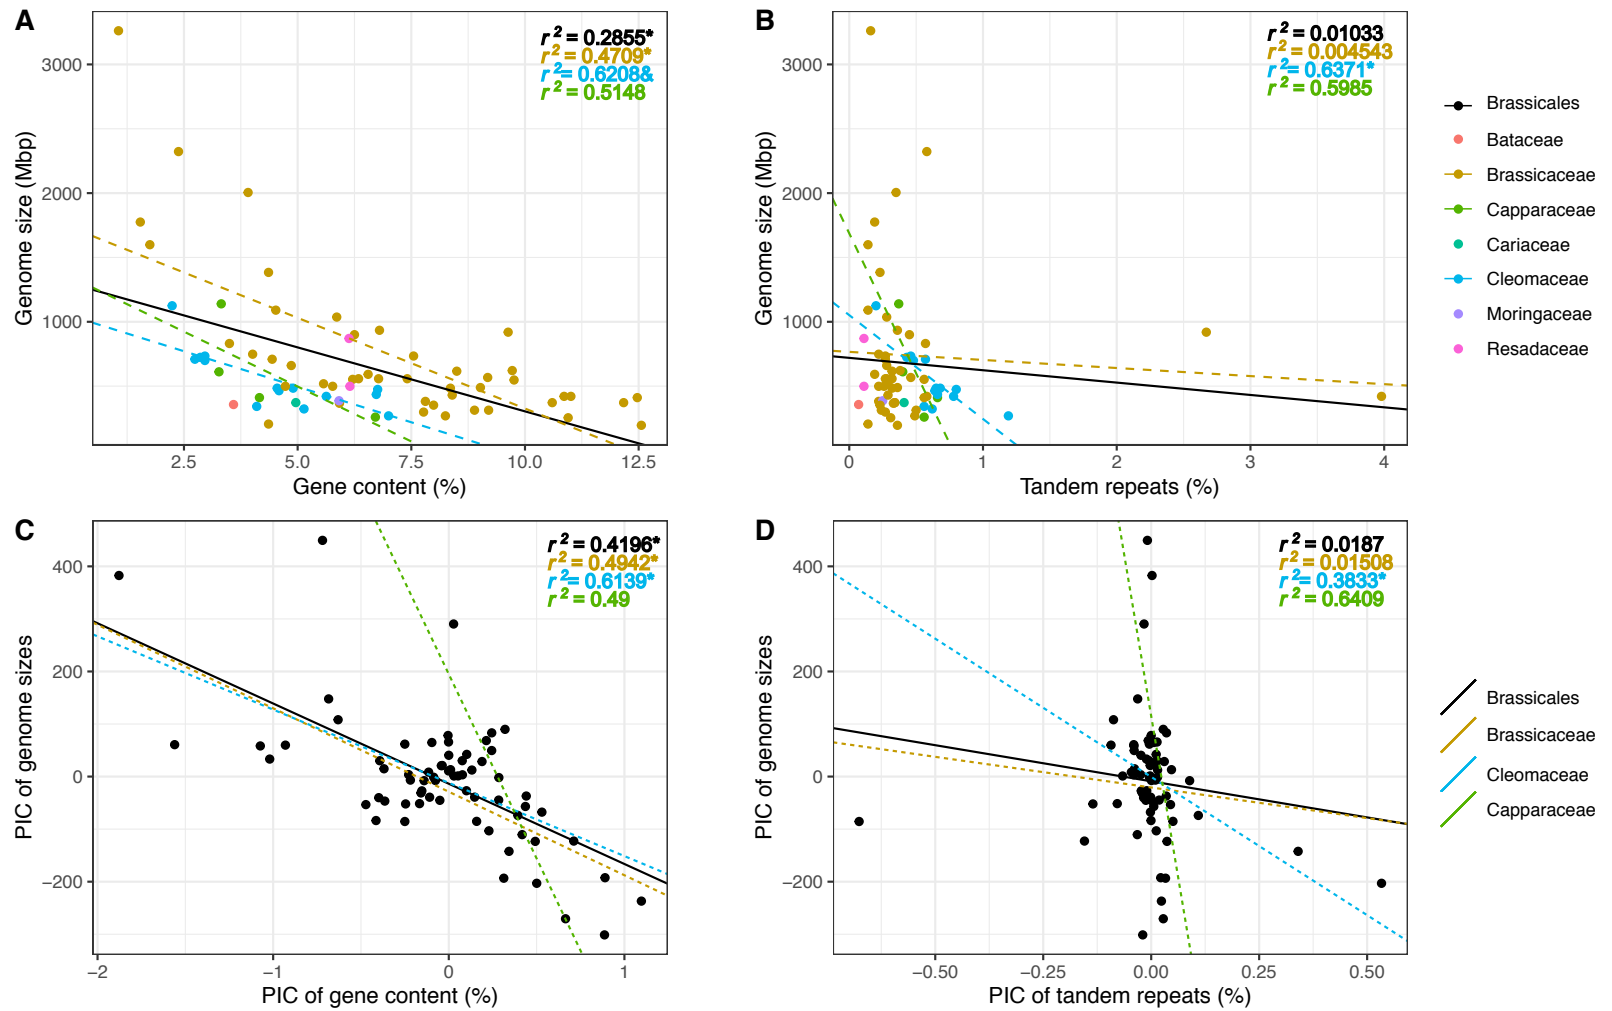

**Supplemental Figure 9.** Linear regression analysis of the relationship between (A) gene content and genome size, (B) tandem repeats and genome size, (C) gene content and genome size corrected for phylogenetic relation, and (D) tandem repeats and genome size corrected for phylogenetic relation. PIC=phylogenetically independent contrasts. Analyses with outliers. Asterisks (\*) next to  $r^2$  values denotes significant p-values at the  $\alpha = 0.1$  level.
