# Supplementary material
Source: publisher figshare collection journal article supplement (https://gsajournals.figshare.com/articles/dataset/_/14462430)
Supplement: Supplementary file 8 [file 1]

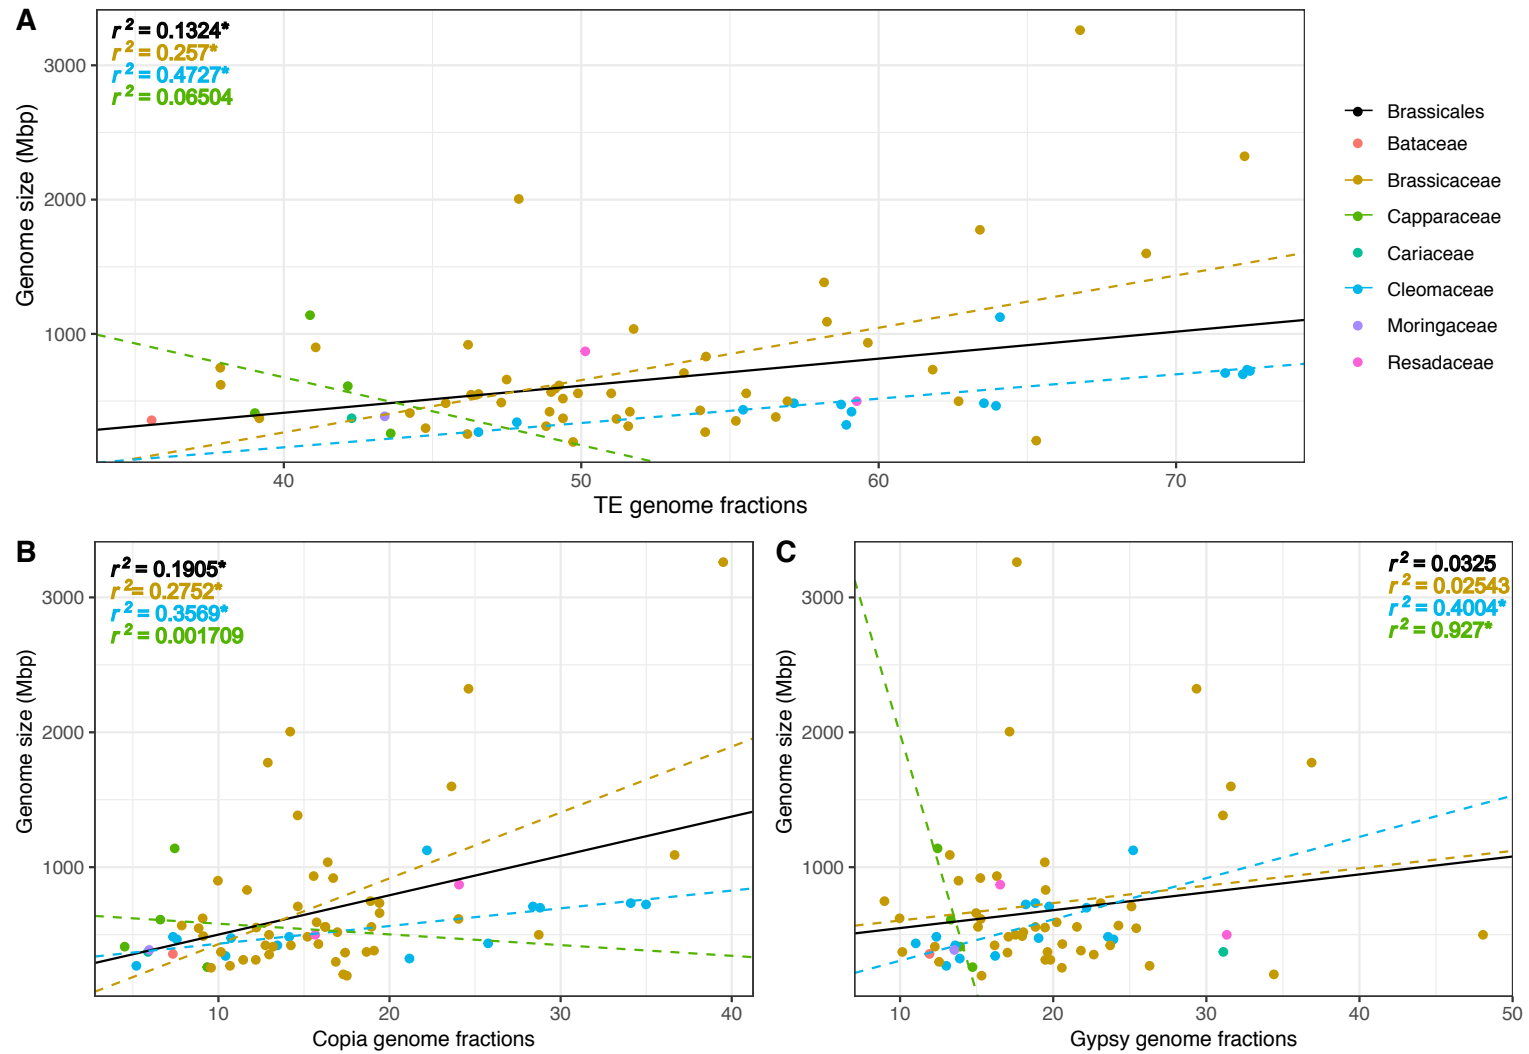

**Supplemental Figure 4.** Linear regression analysis of the relationship between (A) total TE, (B) *Copia*, (C) *Gypsy* element abundance and genome size without phylogenetic correction for all species, including outliers. Asterisks (\*) next to  $r^2$  values denotes significant p-values at the  $\alpha = 0.1$  level.
