# Supplementary material
Source: publisher figshare collection journal article supplement (https://gsajournals.figshare.com/articles/dataset/_/14462430)
Supplement: Supplementary file 9 [file 1]

**Supplemental Table 2.** List of mitochondrial and chloroplast sequences used for data filtering.

| Mitochondrial reads                                               | Chloroplast reads                                                                       |
|-------------------------------------------------------------------|-----------------------------------------------------------------------------------------|
| Brassica napus mitochondrial linear plasmid, complete sequence    | Arabidopsis thaliana chloroplast, complete genome                                       |
| Brassica napus mitochondrion, complete genome                     | Aethionema cordifolium chloroplast, complete genome                                     |
| Carica papaya mitochondrion, complete genome                      | Aethionema grandiflorum chloroplast, complete genome                                    |
| Brassica oleracea mitochondrion, complete genome                  | Olimarabidopsis pumila chloroplast, complete genome                                     |
| Brassica carinata mitochondrion, complete genome                  | Arabis hirsuta chloroplast, complete genome                                             |
| Brassica juncea mitochondrion, complete genome                    | Barbarea verna chloroplast, complete genome                                             |
| Brassica rapa subsp. campestris mitochondrion, complete genome    | Capsella bursa-pastoris chloroplast, complete genome                                    |
| Raphanus sativus mitochondrion, complete genome                   | Crucihimalaya wallichii chloroplast, complete genome                                    |
| Batis maritima mitochondrion, complete genome                     | Draba nemorosa chloroplast, complete genome                                             |
| Brassica nigra mitochondrion, complete genome                     | Lepidium virginicum chloroplast, complete genome                                        |
| Sinapis arvensis mitochondrion, complete genome                   | Lobularia maritima chloroplast, complete genome                                         |
| Arabis alpina mitochondrion, complete genome                      | Nasturtium officinale chloroplast, complete genome                                      |
| Arabidopsis thaliana ecotype Col-0 mitochondrion, complete genome | Carica papaya chloroplast, complete genome                                              |
| Boechera stricta mitochondrion, complete genome                   | Brassica rapa subsp. pekinensis chloroplast, complete genome                            |
|                                                                   | Brassica napus chloroplast, complete genome                                             |
|                                                                   | Pachycladon enysii chloroplast, complete genome                                         |
|                                                                   | Pachycladon cheesemanii chloroplast, complete genome                                    |
|                                                                   | Arabis alpina complete chloroplast genome                                               |
|                                                                   | Raphanus sativus chloroplast, complete genome                                           |
|                                                                   | Capsella rubella chloroplast, complete genome                                           |
|                                                                   | Eutrema salsugineum chloroplast, complete genome                                        |
|                                                                   | Brassica juncea chloroplast, complete genome                                            |
|                                                                   | Isatis tinctoria voucher cp-824 chloroplast, complete genome                            |
|                                                                   | Capsella grandiflora chloroplast, complete genome                                       |
|                                                                   | Schrenkiella parvula chloroplast, complete genome                                       |
|                                                                   | Eutrema yunnanense chloroplast, complete genome                                         |
|                                                                   | Eutrema heterophyllum chloroplast, complete genome                                      |
|                                                                   | Cochlearia borzaeana chloroplast genome, complete sequence, isolate Cbor_1063           |
|                                                                   | Cochlearia islandica chloroplast genome, complete sequence, isolate Csla_1233           |
|                                                                   | Cochlearia pyrenaica chloroplast genome, complete sequence, isolate Cpyr_0260           |
|                                                                   | Cochlearia tridactylites chloroplast genome, complete sequence, isolate Ctri_1288       |
|                                                                   | Ionopsidium acaule chloroplast genome, complete sequence, isolate Iacau_1072            |
|                                                                   | Arabidopsis arenosa chloroplast genome, complete sequence, specimen voucher PUSTE-A     |
|                                                                   | Arabidopsis cebennensis chloroplast genome, complete sequence, specimen voucher 138R-17 |
|                                                                   | Arabidopsis pedemontana chloroplast genome, complete sequence, specimen voucher 114R-03 |
|                                                                   | Camelina sativa chloroplast genome, complete sequence, specimen voucher B-2007-0434-12  |
|                                                                   | Eutrema halophilum chloroplast, complete genome                                         |
|                                                                   | Eutrema botschantzevii chloroplast, complete genome                                     |
|                                                                   | Arabidopsis arenicola chloroplast genome, complete sequence, isolate 2329               |
|                                                                   | Arabidopsis croatica chloroplast genome, complete sequence, isolate ACR                 |

|  |                                                                                   |
|--|-----------------------------------------------------------------------------------|
|  | Arabidopsis neglecta chloroplast genome, complete sequence, isolate AA095-F       |
|  | Arabidopsis petrogena chloroplast genome, complete sequence, isolate SK08-h       |
|  | Arabidopsis suecica chloroplast genome, complete sequence, isolate AS459          |
|  | Arabidopsis umezawana chloroplast genome, complete sequence, isolate 504865       |
|  | Brassica nigra chloroplast, complete genome                                       |
|  | Pugionium dolabratum chloroplast, complete genome                                 |
|  | Pugionium cornutum chloroplast, complete genome                                   |
|  | Cakile arabica chloroplast, complete genome                                       |
|  | Orychophragmus diffusus chloroplast, complete genome                              |
|  | Orychophragmus taibaiensis chloroplast, complete genome                           |
|  | Orychophragmus hupehensis chloroplast, complete genome                            |
|  | Alliaria grandifolia chloroplast, complete genome                                 |
|  | Cardamine limprichtiana chloroplast, complete genome                              |
|  | Alyssum desertorum voucher ADES20160707 chloroplast, complete genome              |
|  | Megadenia pygmaea chloroplast, complete genome                                    |
|  | Matthiola incana chloroplast, complete genome                                     |
|  | Solms-laubachia eurycarpa chloroplast, complete genome                            |
|  | Megacarpaea delavayi chloroplast, complete genome                                 |
|  | Neotorularia korolkowii chloroplast, complete genome                              |
|  | Thlaspi arvense chloroplast, complete genome                                      |
|  | Lepidium meyenii chloroplast, complete genome                                     |
|  | Tarenaya hassleriana chloroplast, complete genome                                 |
|  | Arabidopsis lyrata chloroplast, complete genome                                   |
|  | Arabidopsis halleri chloroplast, complete genome                                  |
|  | Aethionema arabicum chloroplast, complete genome                                  |
|  | Arabidopsis lyrata subsp. lyrata chloroplast DNA, complete genome, strain: MN47   |
|  | Sinapis arvensis chloroplast, complete genome                                     |
|  | Hesperis matronalis chloroplast, complete genome                                  |
|  | Hesperis sylvestris chloroplast, complete genome                                  |
|  | Lobularia libyca chloroplast, complete genome                                     |
|  | Morettia canescens chloroplast, complete genome                                   |
|  | Braya humilis chloroplast, complete genome                                        |
|  | Bunias erucago chloroplast genome, complete sequence, specimen voucher OSBU:12478 |
|  | Bunias orientalis chloroplast genome, complete sequence, specimen voucher RO12    |
|  | Arabis flagellosa Kifune chloroplast DNA, complete genome                         |
|  | Bretschneidera sinensis chloroplast, complete genome                              |
|  | Draba oreades chloroplast, complete genome                                        |
|  | Sisymbrium irio chloroplast J04 DNA, complete genome                              |
|  | Biscutella baetica isolate Bba1 chloroplast, complete genome                      |
|  | Biscutella lyrata isolate Bly2 chloroplast, complete genome                       |
|  | Heldreichia bupleurifolia isolate Hbu3 chloroplast, complete genome               |
|  | Lunaria rediviva isolate Lre4 chloroplast, complete genome                        |
|  | Ricotia aucheri isolate Rau5 chloroplast, complete genome                         |

|  |                                                             |
|--|-------------------------------------------------------------|
|  | Ricotia carnosula isolate Rca6 chloroplast, complete genome |
|  | Ricotia cretica isolate Rcr7 chloroplast, complete genome   |
|  | Ricotia davisiana isolate Rda8 chloroplast, complete genome |
|  | Ricotia isatoides isolate Ris9 chloroplast, complete genome |
|  | Ricotia lunaria isolate Rlu10 chloroplast, complete genome  |
|  | Brassica rapa isolate c13 chloroplast, complete genome      |
|  | Brassica oleracea isolate HDEM chloroplast, complete genome |
|  | Moringa oleifera chloroplast, complete genome               |
