# Supplementary material
Source: publisher figshare collection journal article supplement (https://gsajournals.figshare.com/articles/dataset/_/14462430)
Supplement: Supplementary file 10 [file 1]

**Supplemental Table 3.** Data processing summary, including percent unannotated. Read numbers refer to the number of individual reads for each given category.

| Family       | Species                         | Genome Size (Mbp/1C) | Raw read # | Filtered reads # | Total # reads sampled | Total # reads clustered | Percent unannotated |
|--------------|---------------------------------|----------------------|------------|------------------|-----------------------|-------------------------|---------------------|
| Bataceae     | <i>Batis maritima</i>           | 356.97               | 16,618,110 | 15,093,764       | 500,000               | 177,780                 | 0.171599998         |
| Brassicaceae | <i>Aethionema arabicum</i>      | 933.99               | 17,515,712 | 13,704,622       | 500,000               | 298,181                 | 0.787799994         |
| Brassicaceae | <i>Meniocus linifolius</i>      | 899.76               | 19,025,676 | 17,900,990       | 500,000               | 205,355                 | 0.866199996         |
| Brassicaceae | <i>Barbarea bracteosa</i>       | 268.95               | 17,958,660 | 16,274,282       | 500,000               | 270,845                 | 1.117800003         |
| Brassicaceae | <i>Cakile maritima</i>          | 1383.87              | 20,109,922 | 17,345,778       | 500,000               | 290,826                 | 0.769600012         |
| Brassicaceae | <i>Calepina irregularis</i>     | 254.28               | 18,945,186 | 14,996,774       | 500,000               | 230,865                 | 0.667199996         |
| Brassicaceae | <i>Capsella bursa-pastoris</i>  | 420.54               | 19,924,400 | 17,596,938       | 500,000               | 244,673                 | 1.018199992         |
| Brassicaceae | <i>Cardamine hirsuta</i>        | 489                  | 14,327,238 | 13,353,298       | 500,000               | 236,564                 | 0.893800004         |
| Brassicaceae | <i>Caulanthus amplexicaulis</i> | 484.11               | 17,276,330 | 13,566,798       | 500,000               | 227,219                 | 0.618400004         |
| Brassicaceae | <i>Chorispora tenella</i>       | 366.75               | 21,426,658 | 17,199,758       | 500,000               | 255,923                 | 0.669999999         |
| Brassicaceae | <i>Cochlearia officinalis</i>   | -                    | 19,571,568 | 17,680,152       | 500,000               | 309,075                 | 0.633400004         |
| Brassicaceae | <i>Crambe hispanica</i>         | 660.15               | 17,962,804 | 16,030,190       | 500,000               | 237,458                 | 0.847600007         |
| Brassicaceae | <i>Descurainia pinnata</i>      | 371.64               | 21,064,170 | 18,911,684       | 500,000               | 246,938                 | 0.555600003         |
| Brassicaceae | <i>Descurainia sophioides</i>   | 195.6                | 14,299,738 | 11,722,246       | 500,000               | 248,632                 | 0.685599997         |
| Brassicaceae | <i>Diptychocarpus strictus</i>  | 557.46               | 14,976,410 | 13,219,700       | 500,000               | 255,043                 | 0.805800004         |
| Brassicaceae | <i>Eruca vesicaria</i>          | 709.05               | 19,393,468 | 16,238,972       | 500,000               | 267,256                 | 0.8802              |
| Brassicaceae | <i>Erysimum cheiranthoides</i>  | -                    | 19,255,900 | 14,718,730       | 500,000               | 258,177                 | 1.210200004         |
| Brassicaceae | <i>Euclidium syriacum</i>       | 298.29               | 16,998,370 | 15,169,108       | 500,000               | 223,832                 | 0.641799998         |
| Brassicaceae | <i>Farsetia aegyptia</i>        | 2004.9               | 17,029,968 | 16,121,632       | 500,000               | 239,500                 | 0.934600003         |
| Brassicaceae | <i>Goldbachia laevigata</i>     | 547.68               | 19,699,580 | 18,035,220       | 500,000               | 231,487                 | 0.6218              |
| Brassicaceae | <i>Guillenia lasiophylla</i>    | 621.03               | 11,213,854 | 9,994,886        | 500,000               | 189,388                 | 1.013799997         |
| Brassicaceae | <i>Hesperis matronalis</i>      | 3261.63              | 15,614,640 | 15,174,086       | 500,000               | 333,859                 | 0.537600005         |
| Brassicaceae | <i>Hirschfeldia incana</i>      | 552.57               | 23,055,074 | 21,141,192       | 500,000               | 232,731                 | 1.167399996         |
| Brassicaceae | <i>Iberis amara</i>             | 831.3                | 13,691,982 | 13,178,566       | 500,000               | 270,980                 | 1.225400004         |
| Brassicaceae | <i>Isatis lusitanica</i>        | 381.42               | 23,390,698 | 17,191,612       | 500,000               | 282,703                 | 0.580399999         |
| Brassicaceae | <i>Isatis tinctoria</i>         | 616.14               | 18,892,040 | 15,557,688       | 500,000               | 246,272                 | 0.846399996         |
| Brassicaceae | <i>Lepidium rudemale</i>        | 371.64               | 18,919,410 | 14,656,664       | 500,000               | 195,884                 | 0.829600002         |
| Brassicaceae | <i>Lepidium sativum</i>         | 591.69               | 18,902,354 | 16,242,402       | 500,000               | 245,618                 | 0.521800004         |
| Brassicaceae | <i>Lobularia maritima</i>       | 312.96               | 19,156,394 | 14,101,930       | 500,000               | 257,902                 | 0.571799998         |
| Brassicaceae | <i>Lunaria annua</i>            | 498.78               | 14,633,200 | 12,998,044       | 500,000               | 313,439                 | 0.6024              |
| Brassicaceae | <i>Malcomia maritima</i>        | 312.96               | 15,816,038 | 13,287,250       | 250,000               | 122,050                 | 1.107999997         |
| Brassicaceae | <i>Matthiola longipetala</i>    | 1599.03              | 20,089,766 | 19,078,766       | 500,000               | 344,981                 | 0.498000005         |
| Brassicaceae | <i>Myagrurn perfoliatum</i>     | 352.08               | 13,275,434 | 10,829,146       | 400,000               | 220,796                 | 0.700749995         |
| Brassicaceae | <i>Nasturtium officinale</i>    | 430.32               | 16,369,294 | 13,096,042       | 500,000               | 270,006                 | 0.548799996         |
| Brassicaceae | <i>Olimoarabidopsis pumila</i>  | 410.76               | 14,092,992 | 11,158,530       | 500,000               | 221,195                 | 1.072000003         |
| Brassicaceae | <i>Physaria acutifolia</i>      | 2322.75              | 18,571,300 | 17,404,712       | 500,000               | 361,507                 | 1.074200005         |
| Brassicaceae | <i>Sisymbrium leucocladum</i>   | 498.78               | 21,306,942 | 17,347,804       | 500,000               | 284,673                 | 0.703999996         |
| Brassicaceae | <i>Psychine stylosa</i>         | 518.34               | 18,672,344 | 15,813,984       | 500,000               | 246,922                 | 0.815000003         |
| Brassicaceae | <i>Rorippa islandica</i>        | 567.24               | 14,323,126 | 12,382,424       | 500,000               | 244,939                 | 1.065999997         |
| Brassicaceae | <i>Schizopetalum walkeri</i>    | 1775.07              | 19,473,154 | 18,463,848       | 500,000               | 317,020                 | 0.339599997         |
| Brassicaceae | <i>Sinapis alba</i>             | 557.46               | 19,804,700 | 16,543,166       | 500,000               | 249,449                 | 0.833399989         |

|              |                                   |         |            |            |         |         |             |
|--------------|-----------------------------------|---------|------------|------------|---------|---------|-------------|
| Brassicaceae | <i>Sisymbrium brassiciforme</i>   | -       | 18,157,024 | 15,596,368 | 500,000 | 247,748 | 0.779399995 |
| Brassicaceae | <i>Brassicaceae sp</i>            | 1036.68 | 14,359,594 | 12,039,944 | 500,000 | 258,811 | 0.911999998 |
| Brassicaceae | <i>Streptanthus arizonicus</i>    | 1090.47 | 20,032,530 | 17,795,582 | 500,000 | 291,308 | 0.391000003 |
| Brassicaceae | <i>Streptanthus heterophyllus</i> | 748.17  | 20,440,916 | 18,181,630 | 500,000 | 189,327 | 0.588599995 |
| Brassicaceae | <i>Teesdalia nudicaulis</i>       | 557.46  | 17,158,882 | 15,882,064 | 500,000 | 277,737 | 0.503399998 |
| Brassicaceae | <i>Thlaspi arvense</i>            | 205.38  | 13,742,780 | 12,034,208 | 500,000 | 326,494 | 0.530000001 |
| Brassicaceae | <i>Turritis glabra</i>            | 919.32  | 21,721,584 | 19,358,608 | 500,000 | 230,979 | 1.205600012 |
| Capparaceae  | <i>Boscia sp</i>                  | 410.76  | 21,741,004 | 19,951,552 | 500,000 | 195,140 | 1.424399998 |
| Capparaceae  | <i>Cadaba natalensis</i>          | 259.17  | 18,732,834 | 15,702,982 | 500,000 | 217,968 | 1.441000001 |
| Capparaceae  | <i>Capparis fascicularis</i>      | 1139.37 | 20,757,542 | 19,626,330 | 500,000 | 204,412 | 0.881599999 |
| Capparaceae  | <i>Capparaceae sp</i>             | 611.25  | 18,850,070 | 16,916,978 | 500,000 | 210,754 | 0.937799997 |
| Cariaceae    | <i>Carica papaya</i>              | -       | 26,670,784 | 22,740,686 | 500,000 | 211,407 | 2.305599995 |
| Cleomaceae   | <i>Cleome africana</i>            | 484.11  | 14,535,678 | 12,523,252 | 500,000 | 317,696 | 1.167200004 |
| Cleomaceae   | <i>Coalisisina angustifolia</i>   | 342.3   | 17,685,930 | 16,598,982 | 300,000 | 143,503 | 1.172000003 |
| Cleomaceae   | <i>Cleome arabica</i>             | 464.55  | 15,921,148 | 12,608,460 | 500,000 | 319,725 | 1.200000004 |
| Cleomaceae   | <i>Polanisia sp</i>               | 709.05  | 16,484,740 | 14,702,180 | 500,000 | 358,263 | 0.9018      |
| Cleomaceae   | <i>Coalisisina paradoxa</i>       | 484.11  | 20,093,758 | 17,333,978 | 500,000 | 285,751 | 1.307799997 |
| Cleomaceae   | <i>Cleomaceae sp</i>              | 322.74  | 20,481,152 | 17,552,776 | 500,000 | 294,564 | 1.399400005 |
| Cleomaceae   | <i>Cleome violacea</i>            | 474.33  | 15,366,960 | 13,381,026 | 400,000 | 234,951 | 1.143750005 |
| Cleomaceae   | <i>Melidiscus giganteus</i>       | 420.54  | 18,036,600 | 15,768,938 | 500,000 | 295,440 | 1.648799998 |
| Cleomaceae   | <i>Arivela viscosa</i>            | 268.95  | 18,197,094 | 14,690,618 | 400,000 | 186,177 | 2.092499998 |
| Cleomaceae   | <i>Cleomella serrulata</i>        | -       | -          | -          | -       | -       | -           |
| Cleomaceae   | <i>Gynandropsis gynandra</i>      | 1124.7  | 18,472,870 | 16,563,780 | 500,000 | 320,397 | 0.499200002 |
| Cleomaceae   | <i>Polanisia dodecandra</i>       | 733.5   | 17,592,446 | 16,046,308 | 500,000 | 361,926 | 0.840400003 |
| Cleomaceae   | <i>Polanisia graveolens</i>       | 723.72  | 20,436,352 | 18,930,976 | 500,000 | 362,412 | 0.833199998 |
| Cleomaceae   | <i>Polanisia trachysperma</i>     | 699.27  | 18,164,388 | 14,896,462 | 500,000 | 361,223 | 0.827400004 |
| Cleomaceae   | <i>Tarenaya hassleriana</i>       | 435.21  | 24,418,660 | 22,321,972 | 500,000 | 277,209 | 1.194800003 |
| Moringaceae  | <i>Moringa oleifera</i>           | 386.31  | 20,478,894 | 17,095,412 | 500,000 | 216,954 | 0.590999995 |
| Resadaceae   | <i>Ochradenus baccatus</i>        | 870.42  | 18,680,706 | 17,328,066 | 500,000 | 250,676 | 0.341200004 |
| Resadaceae   | <i>Reseda odorata</i>             | 498.78  | 20,059,938 | 17,972,876 | 500,000 | 296,311 | 0.307800004 |
