# Supplementary material
Source: publisher figshare collection journal article supplement (https://gsajournals.figshare.com/articles/dataset/_/14462430)
Supplement: Supplementary file 11 [file 1]

**Supplemental Table 5.** Data processing summary, including percent unannotated for 20% sampling effort of genome wide coverage. Read numbers refer to the number of individual reads for each given category.

| Family       | Species                           | Genome Size (Mbp/1C) | Raw read # | Filtered reads # | Total # reads sampled | Total # reads clustered | Percent unannotated |
|--------------|-----------------------------------|----------------------|------------|------------------|-----------------------|-------------------------|---------------------|
| Bataceae     | <i>Batis maritima</i>             | 356.97               | 16,618,110 | 15,093,764       | 475,960               | 166,079                 | 0.27                |
| Brassicaceae | <i>Aethionema arabicum</i>        | 933.99               | 17,515,712 | 13,704,622       | 1,245,320             | 920,994                 | 2.62                |
| Brassicaceae | <i>Meniocus linifolius</i>        | 899.76               | 19,025,676 | 17,900,990       | 1,199,680             | 641,961                 | 1.66                |
| Brassicaceae | <i>Barbarea bracteosa</i>         | 268.95               | 17,958,660 | 16,274,282       | 358,600               | 175,287                 | 2.28                |
| Brassicaceae | <i>Cakile maritima</i>            | 1383.87              | 20,109,922 | 17,345,778       | 1,845,158             | 1,360,159               | 1.77                |
| Brassicaceae | <i>Calepina irregularis</i>       | 254.28               | 18,945,186 | 14,996,774       | 339,040               | 133,759                 | 1.15                |
| Brassicaceae | <i>Capsella bursa-pastoris</i>    | 420.54               | 19,924,400 | 17,596,938       | 560,720               | 287,133                 | 2.07                |
| Brassicaceae | <i>Cardamine hirsuta</i>          | 489                  | 14,327,238 | 13,353,298       | 652,000               | 341,868                 | 1.71                |
| Brassicaceae | <i>Caulanthus amplexicaulis</i>   | 484.11               | 17,276,330 | 13,566,798       | 645,480               | 318,709                 | 1.19                |
| Brassicaceae | <i>Chorispora tenella</i>         | 366.75               | 21,426,658 | 17,199,758       | 489,000               | 249,923                 | 1.37                |
| Brassicaceae | <i>Cochlearia officinalis</i>     | -                    | 19,571,568 | 17,680,152       | 978,666               | 700,335                 | 1.86                |
| Brassicaceae | <i>Crambe hispanica</i>           | 660.15               | 17,962,804 | 16,030,190       | 880,200               | 483,616                 | 1.57                |
| Brassicaceae | <i>Descurainia pinnata</i>        | 371.64               | 21,064,170 | 18,911,684       | 495,520               | 242,883                 | 1.10                |
| Brassicaceae | <i>Descurainia sophioides</i>     | 195.6                | 14,299,738 | 11,722,246       | 260,800               | 94,998                  | 1.25                |
| Brassicaceae | <i>Eruca vesicaria</i>            | 709.05               | 19,393,468 | 16,238,972       | 945,400               | 573,488                 | 1.82                |
| Brassicaceae | <i>Erysimum cheiranthoides</i>    | -                    | 19,255,900 | 14,718,730       | 560,720               | 303,330                 | 2.50                |
| Brassicaceae | <i>Euclidium syriacum</i>         | 298.29               | 16,998,370 | 15,169,108       | 397,720               | 162,475                 | 1.16                |
| Brassicaceae | <i>Goldbachia laevigata</i>       | 547.68               | 19,699,580 | 18,035,220       | 730,238               | 387,040                 | 1.24                |
| Brassicaceae | <i>Guillenia lasiophylla</i>      | 621.03               | 11,213,854 | 9,994,886        | 828,040               | 405,402                 | 1.50                |
| Brassicaceae | <i>Hirschfeldia incana</i>        | 552.57               | 23,055,074 | 21,141,192       | 736,760               | 383,811                 | 2.15                |
| Brassicaceae | <i>Iberis amara</i>               | 831.3                | 13,691,982 | 13,178,566       | 1,108,400             | 702,701                 | 2.95                |
| Brassicaceae | <i>Isatis lusitanica</i>          | 381.42               | 23,390,698 | 17,191,612       | 508,560               | 289,084                 | 1.30                |
| Brassicaceae | <i>Isatis tinctoria</i>           | 616.14               | 18,892,040 | 15,557,688       | 821,520               | 476,862                 | 1.71                |
| Brassicaceae | <i>Lepidium rudemale</i>          | 371.64               | 18,919,410 | 14,656,664       | 495,520               | 192,510                 | 1.36                |
| Brassicaceae | <i>Lepidium sativum</i>           | 591.69               | 18,902,354 | 16,242,402       | 788,920               | 436,683                 | 1.02                |
| Brassicaceae | <i>Lobularia maritima</i>         | 312.96               | 19,156,394 | 14,101,930       | 417,280               | 202,955                 | 1.18                |
| Brassicaceae | <i>Nasturtium officinale</i>      | 430.32               | 16,369,294 | 13,096,042       | 573,760               | 319,579                 | 1.24                |
| Brassicaceae | <i>Olimoarabidopsis pumila</i>    | 410.76               | 14,092,992 | 11,158,530       | 547,680               | 254,263                 | 1.92                |
| Brassicaceae | <i>Sisymbrium leucocladum</i>     | 498.78               | 21,306,942 | 17,347,804       | 665,040               | 401,436                 | 1.72                |
| Brassicaceae | <i>Rorippa islandica</i>          | 567.24               | 14,323,126 | 12,382,424       | 756,320               | 435,593                 | 2.30                |
| Brassicaceae | <i>Sisymbrium brassiciforme</i>   | -                    | 18,157,024 | 15,596,368       | 495,520               | 244,732                 | 1.57                |
| Brassicaceae | <i>Streptanthus arizonicus</i>    | 1090.47              | 20,032,530 | 17,795,582       | 1,453,960             | 1,007,120               | 0.93                |
| Brassicaceae | <i>Streptanthus heterophyllus</i> | 748.17               | 20,440,916 | 18,181,630       | 997,560               | 450,432                 | 0.92                |
| Brassicaceae | <i>Teesdalia nudicaulis</i>       | 557.46               | 17,158,882 | 15,882,064       | 743,280               | 450,084                 | 1.22                |
| Brassicaceae | <i>Thlaspi arvense</i>            | 205.38               | 13,742,780 | 12,034,208       | 273,840               | 165,299                 | 1.56                |
| Brassicaceae | <i>Turritis glabra</i>            | 919.32               | 21,721,584 | 19,358,608       | 1,225,760             | 762,939                 | 2.58                |
| Capparaceae  | <i>Boscia sp</i>                  | 410.76               | 21,741,004 | 19,951,552       | 547,680               | 219,942                 | 2.37                |
| Capparaceae  | <i>Cadaba natalensis</i>          | 259.17               | 18,732,834 | 15,702,982       | 345,560               | 130,056                 | 2.38                |
| Capparaceae  | <i>Capparis fascicularis</i>      | 1139.37              | 20,757,542 | 19,626,330       | 1,519,158             | 871,161                 | 1.88                |
| Capparaceae  | <i>Capparaceae sp</i>             | 611.25               | 18,850,070 | 16,916,978       | 815,000               | 395,166                 | 1.70                |
| Cariaceae    | <i>Carica papaya</i>              | -                    | 26,670,784 | 22,740,686       | 496,000               | 209,518                 | 3.94                |

|             |                               |        |            |            |           |           |      |
|-------------|-------------------------------|--------|------------|------------|-----------|-----------|------|
| Cleomaceae  | <i>Cleome africana</i>        | 484.11 | 14,535,678 | 12,523,252 | 645,480   | 426,352   | 3.32 |
| Cleomaceae  | <i>Cleome arabica</i>         | 464.55 | 15,921,148 | 12,608,460 | 619,400   | 409,695   | 3.43 |
| Cleomaceae  | <i>Polanisia sp</i>           | 709.05 | 16,484,740 | 14,702,180 | 945,400   | 720,409   | 3.70 |
| Cleomaceae  | <i>Coalisina paradoxa</i>     | 484.11 | 20,093,758 | 17,333,978 | 645,480   | 385,702   | 3.20 |
| Cleomaceae  | <i>Cleomaceae sp</i>          | 322.74 | 20,481,152 | 17,552,776 | 430,320   | 245,739   | 3.27 |
| Cleomaceae  | <i>Melidiscus giganteus</i>   | 420.54 | 18,036,600 | 15,768,938 | 560,720   | 339,271   | 4.17 |
| Cleomaceae  | <i>Arivela viscosa</i>        | 268.95 | 18,197,094 | 14,690,618 | 358,600   | 161,280   | 3.81 |
| Cleomaceae  | <i>Gynandropsis gynandra</i>  | 1124.7 | 18,472,870 | 16,563,780 | 1,499,600 | 1,097,311 | 1.52 |
| Cleomaceae  | <i>Polanisia dodecandra</i>   | 733.5  | 17,592,446 | 16,046,308 | 978,000   | 753,862   | 3.43 |
| Cleomaceae  | <i>Polanisia graveolens</i>   | 723.72 | 20,436,352 | 18,930,976 | 964,960   | 744,700   | 3.30 |
| Cleomaceae  | <i>Polanisia trachysperma</i> | 699.27 | 18,164,388 | 14,896,462 | 932,360   | 714,394   | 3.46 |
| Cleomaceae  | <i>Tarenaya hassleriana</i>   | 435.21 | 24,418,660 | 22,321,972 | 580,280   | 333,175   | 2.78 |
| Moringaceae | <i>Moringa oleifera</i>       | 386.31 | 20,478,894 | 17,095,412 | 515,080   | 226,111   | 1.09 |
| Resadaceae  | <i>Ochradenus baccatus</i>    | 870.42 | 18,680,706 | 17,328,066 | 1,160,560 | 728,696   | 0.70 |
| Resadaceae  | <i>Reseda odorata</i>         | 498.78 | 20,059,938 | 17,972,876 | 665,040   | 417,552   | 0.75 |
