# Supplementary material
Source: publisher figshare collection journal article supplement (https://gsajournals.figshare.com/articles/dataset/_/14462430)
Supplement: Supplementary file 12 [file 1]

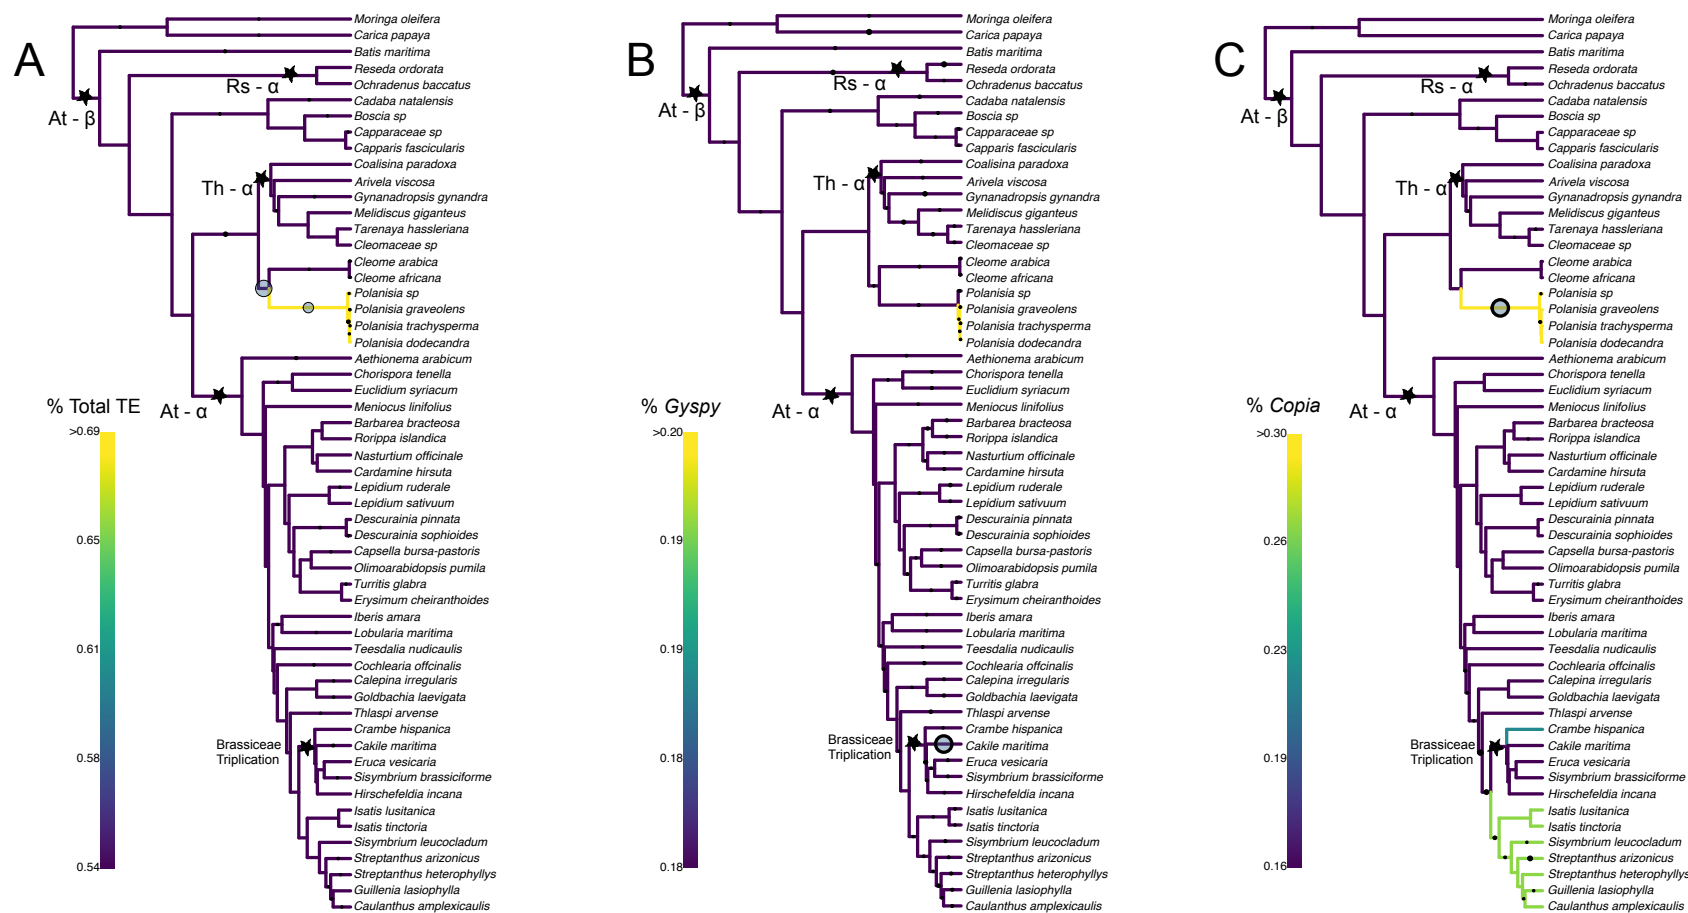

**Supplemental Figure 14.** Bayou analysis for detecting shifts in transposable element abundance for 20% sampling effort of genome wide coverage. (A) Heatmap of total TE, (B) *Gypsy*, and (C) *Copia* abundance with identified shifts plotted. Only shifts with a posterior probability of 0.3 are plotted. Circle size corresponds to the posterior probability of having a shift. Whole-genome duplications are denoted by black stars with named events indicated.
