# Supplementary material
Source: publisher figshare collection journal article supplement (https://gsajournals.figshare.com/articles/dataset/_/14462430)
Supplement: Supplementary file 13 [file 1]

**Supplemental Table S9.** Linear regression results for each dataset. Asterisks (\*) next to Coefficient P-value indicate a significant relationship between genome size and either gene content or tandem repeats using  $\alpha = 0.1$ . However, we note that in many cases, even when significant relationships are determined, the data are not well fit to the model (low  $r^2$  value). PIC=phylogenetically independent contrasts.

| Sampling         | Variable           | Dataset      | p-value with PIC | $r^2$ with PIC | p-value w/o PIC | $r^2$ w/o PIC |
|------------------|--------------------|--------------|------------------|----------------|-----------------|---------------|
| Without outliers | Gene content (%)   | Brassicales  | 0.00643*         | 0.1173         | 0.000818*       | 0.169         |
|                  |                    | Brassicaceae | 0.00758*         | 0.1774         | 0.00192*        | 0.2262        |
|                  |                    | Capparaceae  | 0.506            | 0.49           | 0.282           | 0.5148        |
|                  |                    | Cleomaceae   | 0.00153*         | 0.6139         | 0.000818*       | 0.6208        |
|                  | Tandem repeats (%) | Brassicales  | 0.281            | 0.01937        | 0.834           | 0.0007296     |
|                  |                    | Brassicaceae | 0.454            | 0.01524        | 0.688           | 0.004299      |
|                  |                    | Capparaceae  | 0.409            | 0.6409         | 0.226           | 0.5985        |
|                  |                    | Cleomaceae   | 0.0241*          | 0.3833         | 0.000622*       | 0.6371        |
| With outliers    | Gene content (%)   | Brassicales  | 0.0000000237*    | 0.4196         | 0.00000225*     | 0.2855        |
|                  |                    | Brassicaceae | 0.0000000728*    | 0.4942         | 0.000000141*    | 0.4709        |
|                  |                    | Capparaceae  | 0.506            | 0.49           | 0.282           | 0.5148        |
|                  |                    | Cleomaceae   | 0.00153*         | 0.6139         | 0.000818*       | 0.6208        |
|                  | Tandem repeats (%) | Brassicales  | 0.266            | 0.0187         | 0.406           | 0.01033       |
|                  |                    | Brassicaceae | 0.422            | 0.01508        | 0.656           | 0.004543      |
|                  |                    | Capparaceae  | 0.409            | 0.6409         | 0.226           | 0.5985        |
|                  |                    | Cleomaceae   | 0.0241*          | 0.3833         | 0.000622*       | 0.6371        |
