# Supplementary material
Source: publisher figshare collection journal article supplement (https://gsajournals.figshare.com/articles/dataset/_/14462430)
Supplement: Supplementary file 15 [file 1]

**Supplemental Table S8.** Linear regression results for each dataset. Asterisks (\*) next to Coefficient P-value indicate a significant relationship between genome size and TE content using  $\alpha = 0.1$ . However, we note that in many cases, even when significant relationships are determined, the data are not well fit to the model (low  $r^2$  value). PIC=phylogenetically independent contrasts.

| Sampling                 | TE category  | Dataset      | p-value with PIC | $r^2$ with PIC | p-value w/o PIC | $r^2$ w/o PIC |
|--------------------------|--------------|--------------|------------------|----------------|-----------------|---------------|
| 500K reads               | Total TE     | Brassicales  | 0.698            | 0.002532       | 0.1994          | 0.02686       |
|                          |              | Brassicaceae | 0.577            | 0.008472       | 0.9631          | 0.0000572     |
|                          |              | Capparaceae  | 0.586            | 0.367          | 0.745           | 0.06504       |
|                          |              | Cleomaceae   | 0.0516*          | 0.3023         | 0.00658*        | 0.4727        |
|                          | <i>Copia</i> | Brassicales  | 0.0131*          | 0.09823        | 0.0031*         | 0.1346        |
|                          |              | Brassicaceae | 0.0277*          | 0.1243         | 0.05311*        | 0.09491       |
|                          |              | Capparaceae  | 0.655            | 0.2658         | 0.959           | 0.001709      |
|                          |              | Cleomaceae   | 0.0874*          | 0.2424         | 0.024*          | 0.3569        |
|                          | <i>Gypsy</i> | Brassicales  | 0.116            | 0.04069        | 0.467           | 0.008702      |
|                          |              | Brassicaceae | 0.142            | 0.05747        | 0.158           | 0.05171       |
|                          |              | Capparaceae  | 0.0478*          | 0.9944         | 0.0372*         | 0.927         |
|                          |              | Cleomaceae   | 0.854            | 0.00322        | 0.0151*         | 0.4004        |
| 20% genome coverage      | Total TE     | Brassicales  | 0.0000000042*    | 0.502          | 0.000000908*    | 0.3796        |
|                          |              | Brassicaceae | 0.0000128*       | 0.4871         | 0.0000246*      | 0.4526        |
|                          |              | Capparaceae  | 0.04*            | 0.996          | 0.0177*         | 0.9649        |
|                          |              | Cleomaceae   | 0.00422*         | 0.616          | 0.00207*        | 0.6294        |
|                          | <i>Copia</i> | Brassicales  | 0.000053*        | 0.281          | 0.000461*       | 0.2156        |
|                          |              | Brassicaceae | 0.000256*        | 0.3741         | 0.00756*        | 0.2147        |
|                          |              | Capparaceae  | 0.346            | 0.7327         | 0.516           | 0.2345        |
|                          |              | Cleomaceae   | 0.0156*          | 0.4959         | 0.033*          | 0.3793        |
|                          | <i>Gypsy</i> | Brassicales  | 0.0412*          | 0.08074        | 0.03089*        | 0.08812       |
|                          |              | Brassicaceae | 0.128            | 0.07794        | 0.325           | 0.03229       |
|                          |              | Capparaceae  | 0.0796*          | 0.9844         | 0.0394*         | 0.9227        |
|                          |              | Cleomaceae   | 0.0945*          | 0.2795         | 0.0031*         | 0.5998        |
| 500K reads with outliers | Total TE     | Brassicales  | 0.00211*         | 0.1343         | 0.00212*        | 0.1324        |
|                          |              | Brassicaceae | 0.00319*         | 0.185          | 0.000324*       | 0.257         |
|                          |              | Capparaceae  | 0.586            | 0.367          | 0.745           | 0.06504       |
|                          |              | Cleomaceae   | 0.0516*          | 0.3023         | 0.00658*        | 0.4727        |
|                          | <i>Copia</i> | Brassicales  | 0.000271*        | 0.1832         | 0.000178*       | 0.1905        |
|                          |              | Brassicaceae | 0.000184*        | 0.2803         | 0.000182*       | 0.2752        |
|                          |              | Capparaceae  | 0.655            | 0.2658         | 0.959           | 0.001709      |
|                          |              | Cleomaceae   | 0.0874*          | 0.2424         | 0.0241*         | 0.3569        |
|                          | <i>Gypsy</i> | Brassicales  | 0.45             | 0.008673       | 0.1383          | 0.0325        |
|                          |              | Brassicaceae | 0.341            | 0.02114        | 0.2898          | 0.02543       |
|                          |              | Capparaceae  | 0.0478*          | 0.9944         | 0.0372*         | 0.927         |
|                          |              | Cleomaceae   | 0.854            | 0.00322        | 0.0151*         | 0.4004        |
