# Supplementary material
Source: publisher figshare collection journal article supplement (https://gsajournals.figshare.com/articles/dataset/_/14462430)
Supplement: Supplementary file 19 [file 1]

**Supplemental Table 7.** Comparison of estimated TE % using Transposome to published estimates using genomes.

| <b>Species</b>           | <b>Estimated % TE in Transposome (500K reads)</b> | <b>Estimated % TE in Transposome (20% coverage)</b> | <b>Estimated % TE in genome</b> | <b>Citation</b>       |
|--------------------------|---------------------------------------------------|-----------------------------------------------------|---------------------------------|-----------------------|
| <i>Carica papaya</i>     | 42%                                               | 42%                                                 | 43%                             | Nagarajan et al. 2008 |
| <i>Moringa oleifera</i>  | 43%                                               | 44%                                                 | 47%                             | Tian et al. 2015      |
| <i>Cardamine hirsuta</i> | 47%                                               | 52%                                                 | 40%                             | Gan et al. 2016       |
