# Supplementary material
Source: publisher figshare collection journal article supplement (https://gsajournals.figshare.com/articles/dataset/_/14462430)
Supplement: Supplementary file 20 [file 1]

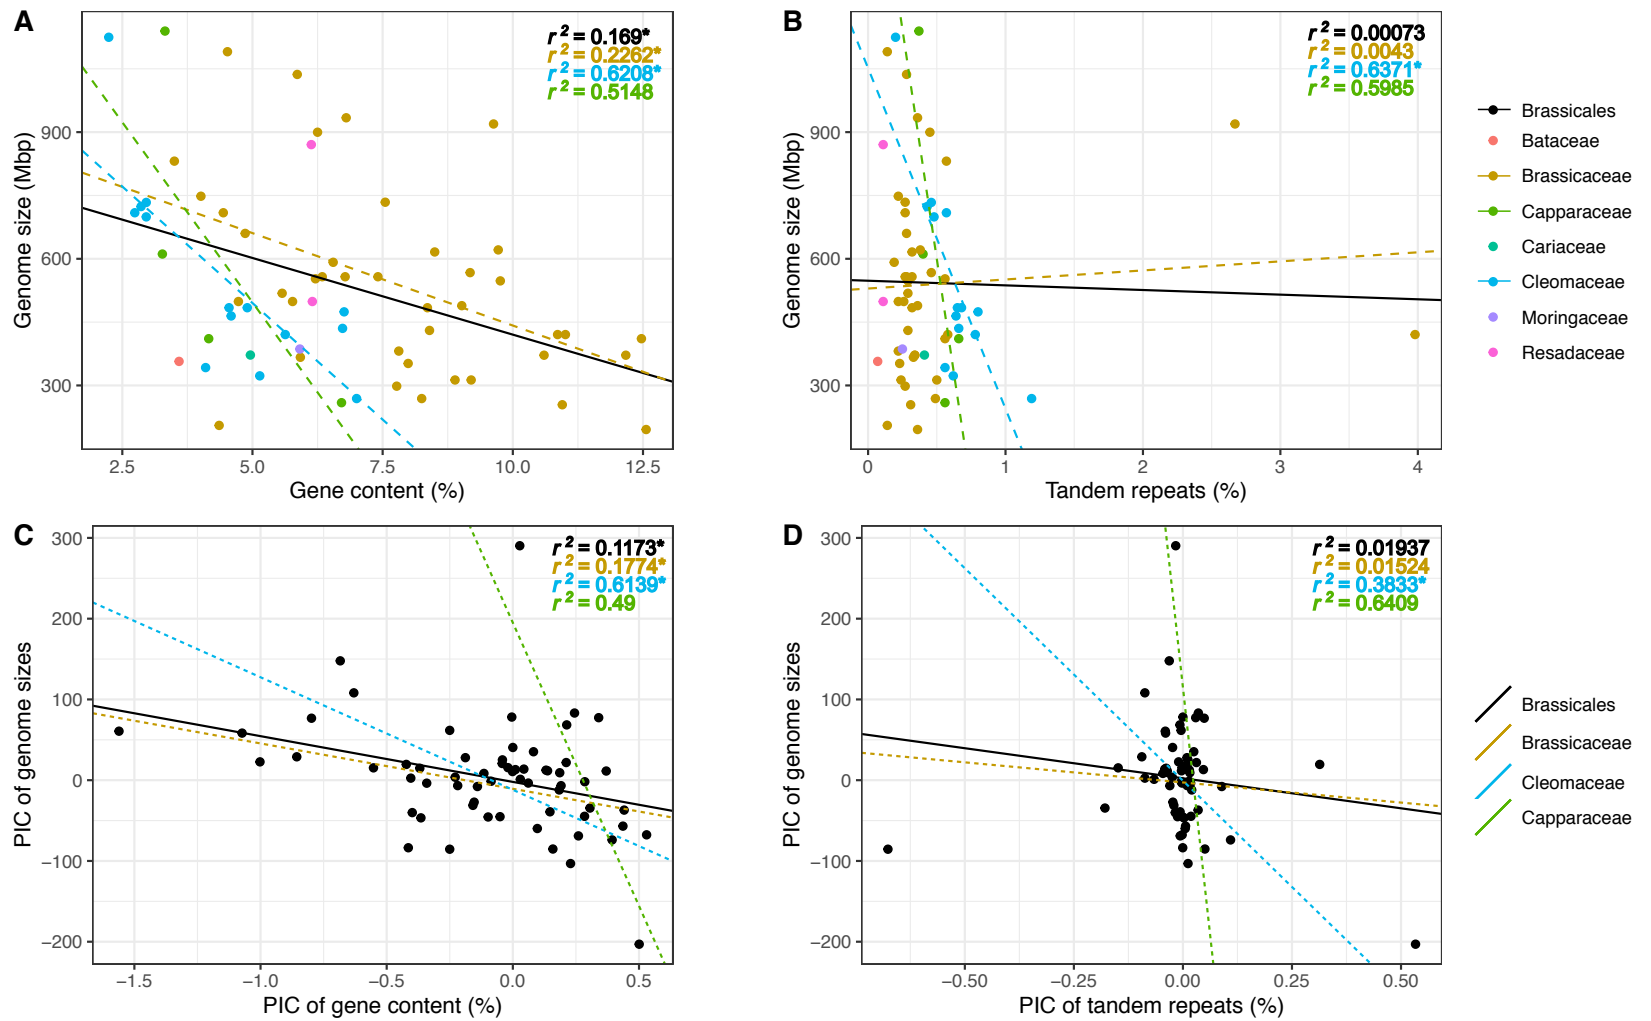

**Supplemental Figure 8.** Linear regression analysis of the relationship between (A) gene content and genome size, (B) tandem repeats and genome size, (C) gene content and genome size corrected for phylogenetic relation, and (D) tandem repeats and genome size corrected for phylogenetic relation. PIC=phylogenetically independent contrasts. Analyses without outliers. Asterisks (\*) next to  $r^2$  values denotes significant p-values at the  $\alpha = 0.1$  level.
