# Supplementary material
Source: publisher figshare collection journal article supplement (https://gsajournals.figshare.com/articles/dataset/_/14462430)
Supplement: Supplementary file 21 [file 1]

**Supplemental Table 1.** Taxon sampling with genome size, previously published chromosome counts, and repetitive element abundance. Chromosome counts as in <http://legacy.tropicos.org/Project/PCN>. Asterisks (\*) indicate samples with known ploidy level.

| Family       | Species                           | Genome Size (Mbp/1C) | Chromosome count (n) | Copia % | Gypsy % | Harbinger % | hAT % | Helitron % | L1 % | MuDR % | other DNA transposon % | other ltr retrotransposon % | other non-ltr retrotransposon % | Penelope % | SINE2/tRNA % | Novosib % | RTE % | RTEX % | RandI % | Total_RE % |
|--------------|-----------------------------------|----------------------|----------------------|---------|---------|-------------|-------|------------|------|--------|------------------------|-----------------------------|---------------------------------|------------|--------------|-----------|-------|--------|---------|------------|
| Bataceae     | <i>Batis maritima</i>             | 356.97               | 11                   | 0.07    | 0.12    | 0.01        | 0.01  | 0.06       | 0.01 | 0.06   | 0.01                   | 0.00                        | 0.00                            | 0.00       | 0.00         | 0.00      | 0.00  | 0.00   | 0.00    | 0.36       |
| Brassicaceae | <i>Aethionema arabicum</i> *      | 933.99               | 11                   | 0.16    | 0.16    | 0.01        | 0.02  | 0.08       | 0.02 | 0.12   | 0.01                   | 0.01                        | 0.00                            | 0.00       | 0.00         | 0.00      | 0.00  | 0.00   | 0.00    | 0.60       |
| Brassicaceae | <i>Meniocus linifolius</i>        | 899.76               | -                    | 0.10    | 0.14    | 0.01        | 0.01  | 0.06       | 0.00 | 0.08   | 0.01                   | 0.00                        | 0.00                            | 0.00       | 0.00         | 0.00      | 0.00  | 0.00   | 0.00    | 0.41       |
| Brassicaceae | <i>Barbarea bracteosa</i>         | 268.95               | 8                    | 0.11    | 0.26    | 0.01        | 0.02  | 0.06       | 0.01 | 0.05   | 0.01                   | 0.00                        | 0.00                            | 0.00       | 0.00         | 0.00      | 0.00  | 0.00   | 0.00    | 0.54       |
| Brassicaceae | <i>Cakile maritima</i> *          | 1383.87              | 9                    | 0.15    | 0.31    | 0.01        | 0.01  | 0.02       | 0.01 | 0.04   | 0.01                   | 0.00                        | 0.00                            | 0.00       | 0.01         | 0.00      | 0.00  | 0.00   | 0.00    | 0.58       |
| Brassicaceae | <i>Calepina irregularis</i>       | 254.28               | 14                   | 0.10    | 0.21    | 0.01        | 0.02  | 0.05       | 0.01 | 0.05   | 0.02                   | 0.00                        | 0.00                            | 0.00       | 0.00         | 0.00      | 0.00  | 0.00   | 0.00    | 0.46       |
| Brassicaceae | <i>Capsella bursa-pastoris</i>    | 420.54               | 8,16                 | 0.13    | 0.16    | 0.01        | 0.02  | 0.06       | 0.01 | 0.06   | 0.02                   | 0.01                        | 0.00                            | 0.00       | 0.00         | 0.00      | 0.00  | 0.00   | 0.00    | 0.49       |
| Brassicaceae | <i>Cardamine hirsuta</i>          | 489                  | 7,8                  | 0.09    | 0.18    | 0.01        | 0.02  | 0.10       | 0.00 | 0.06   | 0.01                   | 0.00                        | 0.00                            | 0.00       | 0.00         | 0.00      | 0.00  | 0.00   | 0.00    | 0.47       |
| Brassicaceae | <i>Caulanthus amplexicaulis</i> * | 484.11               | -                    | 0.15    | 0.17    | 0.01        | 0.01  | 0.04       | 0.01 | 0.05   | 0.01                   | 0.00                        | 0.00                            | 0.00       | 0.00         | 0.00      | 0.00  | 0.00   | 0.00    | 0.45       |
| Brassicaceae | <i>Chorispora tenella</i>         | 366.75               | 7                    | 0.17    | 0.17    | 0.01        | 0.02  | 0.05       | 0.02 | 0.06   | 0.01                   | 0.00                        | 0.00                            | 0.00       | 0.00         | 0.00      | 0.00  | 0.00   | 0.00    | 0.51       |
| Brassicaceae | <i>Cochlearia officinalis</i>     | 735                  | 12                   | 0.19    | 0.23    | 0.01        | 0.03  | 0.06       | 0.01 | 0.07   | 0.01                   | 0.00                        | 0.00                            | 0.00       | 0.00         | 0.00      | 0.00  | 0.00   | 0.00    | 0.62       |
| Brassicaceae | <i>Crambe hispanica</i> *         | 660.15               | 15,30                | 0.19    | 0.15    | 0.01        | 0.01  | 0.04       | 0.01 | 0.05   | 0.01                   | 0.00                        | 0.00                            | 0.00       | 0.00         | 0.00      | 0.00  | 0.00   | 0.00    | 0.47       |
| Brassicaceae | <i>Descurainia pinnata</i> *      | 371.64               | 7                    | 0.19    | 0.20    | 0.01        | 0.01  | 0.04       | 0.01 | 0.04   | 0.01                   | 0.00                        | 0.00                            | 0.00       | 0.00         | 0.00      | 0.00  | 0.00   | 0.00    | 0.49       |
| Brassicaceae | <i>Descurainia sophioides</i> *   | 195.6                | 7,14                 | 0.18    | 0.15    | 0.01        | 0.01  | 0.09       | 0.00 | 0.04   | 0.01                   | 0.00                        | 0.00                            | 0.00       | 0.00         | 0.00      | 0.00  | 0.00   | 0.00    | 0.50       |
| Brassicaceae | <i>Diptychocarpus strictus</i> *  | 557.46               | 7                    | 0.16    | 0.15    | 0.01        | 0.02  | 0.11       | 0.01 | 0.04   | 0.01                   | 0.00                        | 0.00                            | 0.00       | 0.00         | 0.00      | 0.00  | 0.00   | 0.00    | 0.51       |
| Brassicaceae | <i>Eruca vesicaria</i> *          | 709.05               | 11                   | 0.15    | 0.25    | 0.01        | 0.01  | 0.05       | 0.01 | 0.05   | 0.01                   | 0.00                        | 0.00                            | 0.00       | 0.01         | 0.00      | 0.00  | 0.00   | 0.00    | 0.53       |
| Brassicaceae | <i>Erysimum cheiranthoides</i>    | 813.4                | 8                    | 0.14    | 0.24    | 0.01        | 0.02  | 0.04       | 0.01 | 0.03   | 0.02                   | 0.01                        | 0.00                            | 0.00       | 0.01         | 0.00      | 0.00  | 0.00   | 0.00    | 0.52       |
| Brassicaceae | <i>Euclidium syriacum</i> *       | 298.29               | 7                    | 0.17    | 0.13    | 0.01        | 0.01  | 0.06       | 0.00 | 0.06   | 0.01                   | 0.00                        | 0.00                            | 0.00       | 0.00         | 0.00      | 0.00  | 0.00   | 0.00    | 0.45       |
| Brassicaceae | <i>Farsetia aegyptia</i>          | 2004.9               | 24                   | 0.14    | 0.17    | 0.01        | 0.02  | 0.08       | 0.01 | 0.05   | 0.01                   | 0.00                        | 0.00                            | 0.00       | 0.00         | 0.00      | 0.00  | 0.00   | 0.00    | 0.48       |
| Brassicaceae | <i>Goldbachia laevigata</i>       | 547.68               | 14                   | 0.09    | 0.25    | 0.01        | 0.02  | 0.03       | 0.01 | 0.04   | 0.01                   | 0.00                        | 0.00                            | 0.00       | 0.00         | 0.00      | 0.00  | 0.00   | 0.00    | 0.46       |
| Brassicaceae | <i>Guillenia lasiophylla</i>      | 621.03               | -                    | 0.09    | 0.10    | 0.01        | 0.02  | 0.08       | 0.01 | 0.06   | 0.01                   | 0.00                        | 0.00                            | 0.00       | 0.00         | 0.00      | 0.00  | 0.00   | 0.00    | 0.38       |
| Brassicaceae | <i>Hesperis matronalis</i>        | 3261.63              | 7                    | 0.40    | 0.18    | 0.01        | 0.01  | 0.03       | 0.00 | 0.04   | 0.00                   | 0.00                        | 0.00                            | 0.00       | 0.00         | 0.00      | 0.00  | 0.00   | 0.00    | 0.67       |
| Brassicaceae | <i>Hirschfeldia incana</i>        | 552.57               | 7                    | 0.12    | 0.19    | 0.01        | 0.01  | 0.05       | 0.01 | 0.06   | 0.01                   | 0.00                        | 0.00                            | 0.00       | 0.00         | 0.00      | 0.00  | 0.00   | 0.00    | 0.47       |
| Brassicaceae | <i>Iberis amara</i> *             | 831.3                | 7                    | 0.12    | 0.20    | 0.02        | 0.01  | 0.09       | 0.00 | 0.09   | 0.01                   | 0.00                        | 0.00                            | 0.00       | 0.00         | 0.00      | 0.00  | 0.00   | 0.00    | 0.54       |
| Brassicaceae | <i>Isatis lusitanica</i>          | 381.42               | 14                   | 0.19    | 0.22    | 0.01        | 0.01  | 0.06       | 0.01 | 0.04   | 0.01                   | 0.02                        | 0.00                            | 0.00       | 0.00         | 0.00      | 0.00  | 0.00   | 0.00    | 0.57       |

|              |                                   |         |       |      |      |      |      |      |      |      |      |      |      |      |      |      |      |      |      |      |
|--------------|-----------------------------------|---------|-------|------|------|------|------|------|------|------|------|------|------|------|------|------|------|------|------|------|
| Brassicaceae | <i>Isatis tinctoria</i> *         | 616.14  | 8,16  | 0.24 | 0.15 | 0.00 | 0.01 | 0.03 | 0.01 | 0.03 | 0.01 | 0.00 | 0.00 | 0.00 | 0.00 | 0.00 | 0.00 | 0.00 | 0.00 | 0.49 |
| Brassicaceae | <i>Lepidium ruderale</i>          | 371.64  | 12,16 | 0.10 | 0.10 | 0.02 | 0.02 | 0.06 | 0.00 | 0.08 | 0.01 | 0.00 | 0.00 | 0.00 | 0.00 | 0.00 | 0.00 | 0.00 | 0.00 | 0.39 |
| Brassicaceae | <i>Lepidium sativuum</i> *        | 591.69  | 12    | 0.16 | 0.20 | 0.02 | 0.01 | 0.04 | 0.00 | 0.04 | 0.01 | 0.00 | 0.00 | 0.00 | 0.00 | 0.00 | 0.00 | 0.00 | 0.00 | 0.49 |
| Brassicaceae | <i>Lobularia maritima</i>         | 312.96  | 15    | 0.11 | 0.20 | 0.01 | 0.02 | 0.05 | 0.04 | 0.05 | 0.01 | 0.01 | 0.00 | 0.01 | 0.00 | 0.00 | 0.00 | 0.00 | 0.00 | 0.52 |
| Brassicaceae | <i>Lunaria annua</i> *            | 498.78  | 8     | 0.13 | 0.48 | 0.00 | 0.00 | 0.00 | 0.00 | 0.00 | 0.00 | 0.01 | 0.00 | 0.00 | 0.00 | 0.00 | 0.00 | 0.00 | 0.00 | 0.63 |
| Brassicaceae | <i>Malcomia maritima</i> *        | 312.96  | 7     | 0.12 | 0.19 | 0.01 | 0.01 | 0.07 | 0.00 | 0.04 | 0.02 | 0.01 | 0.00 | 0.00 | 0.00 | 0.00 | 0.00 | 0.00 | 0.00 | 0.49 |
| Brassicaceae | <i>Matthiola longipetala</i>      | 1599.03 | 7     | 0.24 | 0.32 | 0.01 | 0.01 | 0.04 | 0.01 | 0.04 | 0.01 | 0.01 | 0.00 | 0.00 | 0.00 | 0.00 | 0.00 | 0.00 | 0.00 | 0.69 |
| Brassicaceae | <i>Myagrum perfoliatum</i> *      | 352.08  | 16    | 0.13 | 0.23 | 0.01 | 0.01 | 0.12 | 0.01 | 0.04 | 0.01 | 0.00 | 0.00 | 0.00 | 0.00 | 0.00 | 0.00 | 0.00 | 0.00 | 0.55 |
| Brassicaceae | <i>Nasturtium officinale</i>      | 430.32  | 15    | 0.16 | 0.21 | 0.00 | 0.02 | 0.05 | 0.03 | 0.05 | 0.01 | 0.01 | 0.00 | 0.00 | 0.00 | 0.00 | 0.00 | 0.00 | 0.00 | 0.54 |
| Brassicaceae | <i>Olimoarabidopsis pumila</i>    | 410.76  | 5     | 0.13 | 0.12 | 0.01 | 0.02 | 0.08 | 0.01 | 0.04 | 0.02 | 0.00 | 0.00 | 0.00 | 0.00 | 0.00 | 0.00 | 0.00 | 0.00 | 0.44 |
| Brassicaceae | <i>Physaria acutifolia</i>        | 2322.75 | -     | 0.25 | 0.29 | 0.01 | 0.01 | 0.06 | 0.03 | 0.03 | 0.01 | 0.01 | 0.00 | 0.02 | 0.00 | 0.00 | 0.00 | 0.00 | 0.00 | 0.72 |
| Brassicaceae | <i>Sisymbrium leucocladum</i>     | 498.78  | 8     | 0.29 | 0.18 | 0.01 | 0.01 | 0.03 | 0.01 | 0.03 | 0.01 | 0.01 | 0.00 | 0.00 | 0.00 | 0.00 | 0.00 | 0.00 | 0.00 | 0.57 |
| Brassicaceae | <i>Psychine stylosa</i>           | 518.34  | 16    | 0.17 | 0.18 | 0.01 | 0.01 | 0.04 | 0.01 | 0.05 | 0.01 | 0.00 | 0.00 | 0.00 | 0.01 | 0.00 | 0.00 | 0.00 | 0.00 | 0.49 |
| Brassicaceae | <i>Rorippa islandica</i> *        | 567.24  | 10    | 0.08 | 0.24 | 0.01 | 0.01 | 0.07 | 0.01 | 0.06 | 0.01 | 0.00 | 0.00 | 0.00 | 0.00 | 0.00 | 0.00 | 0.00 | 0.00 | 0.49 |
| Brassicaceae | <i>Schizopetalum walkeri</i>      | 1775.07 | 12    | 0.13 | 0.37 | 0.01 | 0.01 | 0.04 | 0.01 | 0.06 | 0.01 | 0.01 | 0.00 | 0.00 | 0.00 | 0.00 | 0.00 | 0.00 | 0.00 | 0.63 |
| Brassicaceae | <i>Sinapis alba</i> *             | 557.46  | 7     | 0.19 | 0.19 | 0.01 | 0.01 | 0.04 | 0.00 | 0.04 | 0.01 | 0.00 | 0.00 | 0.00 | 0.00 | 0.00 | 0.00 | 0.00 | 0.00 | 0.50 |
| Brassicaceae | <i>Sisymbrium brassiciforme</i>   | -       | 14    | 0.27 | 0.15 | 0.01 | 0.01 | 0.02 | 0.00 | 0.03 | 0.00 | 0.00 | 0.00 | 0.00 | 0.00 | 0.00 | 0.00 | 0.00 | 0.00 | 0.50 |
| Brassicaceae | <i>Brassicaceae sp</i> *          | 1036.68 | 14    | 0.16 | 0.19 | 0.01 | 0.01 | 0.09 | 0.00 | 0.04 | 0.01 | 0.00 | 0.00 | 0.00 | 0.00 | 0.00 | 0.00 | 0.00 | 0.00 | 0.52 |
| Brassicaceae | <i>Streptanthus arizonicus</i>    | 1090.47 | -     | 0.37 | 0.13 | 0.01 | 0.01 | 0.03 | 0.01 | 0.03 | 0.00 | 0.00 | 0.00 | 0.00 | 0.00 | 0.00 | 0.00 | 0.00 | 0.00 | 0.58 |
| Brassicaceae | <i>Streptanthus heterophyllus</i> | 748.17  | 18    | 0.19 | 0.09 | 0.01 | 0.01 | 0.03 | 0.00 | 0.04 | 0.01 | 0.00 | 0.00 | 0.00 | 0.00 | 0.00 | 0.00 | 0.00 | 0.00 | 0.38 |
| Brassicaceae | <i>Teesdalia nudicaulis</i>       | 557.46  | 7     | 0.16 | 0.22 | 0.01 | 0.02 | 0.06 | 0.01 | 0.07 | 0.01 | 0.00 | 0.00 | 0.00 | 0.00 | 0.00 | 0.00 | 0.00 | 0.00 | 0.56 |
| Brassicaceae | <i>Thlaspi arvense</i> *          | 205.38  | 6     | 0.17 | 0.34 | 0.01 | 0.01 | 0.08 | 0.01 | 0.03 | 0.01 | 0.00 | 0.00 | 0.00 | 0.00 | 0.00 | 0.00 | 0.00 | 0.00 | 0.65 |
| Brassicaceae | <i>Turritis glabra</i>            | 919.32  | -     | 0.17 | 0.15 | 0.00 | 0.02 | 0.03 | 0.01 | 0.05 | 0.02 | 0.01 | 0.00 | 0.00 | 0.00 | 0.00 | 0.00 | 0.00 | 0.00 | 0.46 |
| Capparaceae  | <i>Boscia sp</i>                  | 410.76  | -     | 0.05 | 0.14 | 0.01 | 0.02 | 0.07 | 0.01 | 0.08 | 0.01 | 0.01 | 0.00 | 0.00 | 0.00 | 0.00 | 0.00 | 0.00 | 0.00 | 0.39 |
| Capparaceae  | <i>Cadaba natalensis</i>          | 259.17  | -     | 0.09 | 0.15 | 0.01 | 0.02 | 0.07 | 0.01 | 0.07 | 0.01 | 0.00 | 0.00 | 0.00 | 0.00 | 0.00 | 0.00 | 0.00 | 0.00 | 0.44 |
| Capparaceae  | <i>Capparis fascicularis</i>      | 1139.37 | -     | 0.07 | 0.12 | 0.01 | 0.02 | 0.06 | 0.01 | 0.09 | 0.01 | 0.01 | 0.00 | 0.00 | 0.00 | 0.00 | 0.00 | 0.00 | 0.00 | 0.41 |
| Capparaceae  | <i>Capparaceae sp</i>             | 611.25  | 9     | 0.07 | 0.13 | 0.01 | 0.02 | 0.07 | 0.01 | 0.09 | 0.01 | 0.01 | 0.00 | 0.00 | 0.00 | 0.00 | 0.00 | 0.00 | 0.00 | 0.42 |
| Cariaceae    | <i>Carica papaya</i>              | 392     | -     | 0.06 | 0.31 | 0.00 | 0.01 | 0.01 | 0.02 | 0.01 | 0.00 | 0.00 | 0.00 | 0.00 | 0.00 | 0.00 | 0.00 | 0.00 | 0.00 | 0.42 |
| Cleomaceae   | <i>Cleome africana</i>            | 484.11  | -     | 0.07 | 0.24 | 0.01 | 0.02 | 0.13 | 0.01 | 0.12 | 0.02 | 0.01 | 0.00 | 0.00 | 0.00 | 0.00 | 0.00 | 0.00 | 0.00 | 0.64 |
| Cleomaceae   | <i>Coalisina angustifolia</i>     | 342.3   | 10    | 0.10 | 0.16 | 0.01 | 0.01 | 0.07 | 0.01 | 0.10 | 0.01 | 0.00 | 0.00 | 0.00 | 0.00 | 0.00 | 0.00 | 0.00 | 0.00 | 0.48 |
| Cleomaceae   | <i>Cleome arabica</i>             | 464.55  | -     | 0.08 | 0.24 | 0.01 | 0.02 | 0.14 | 0.01 | 0.12 | 0.01 | 0.01 | 0.00 | 0.00 | 0.00 | 0.00 | 0.00 | 0.00 | 0.00 | 0.64 |
| Cleomaceae   | <i>Polanisia sp</i>               | 709.05  | -     | 0.28 | 0.20 | 0.01 | 0.02 | 0.07 | 0.00 | 0.11 | 0.01 | 0.00 | 0.00 | 0.00 | 0.00 | 0.00 | 0.00 | 0.00 | 0.00 | 0.72 |

[illegible]
