# Supplementary material
Source: publisher figshare collection journal article supplement (https://gsajournals.figshare.com/articles/dataset/_/14462430)
Supplement: Supplementary file 22 [file 1]

**Supplemental Table 6.** Genome size estimates produced for this study in comparison with available previously published estimates from the Kew C-value database (<https://cvalues.science.kew.org/>).

| Family       | Species                         | Genome Size (Mbp/1C) | Size in Kew (Mbp/1C) | Citation                    |
|--------------|---------------------------------|----------------------|----------------------|-----------------------------|
| Bataceae     | <i>Batis maritima</i>           | 356.97               | -                    | -                           |
| Brassicaceae | <i>Aethionema arabicum</i>      | 933.99               | -                    | -                           |
| Brassicaceae | <i>Meniocus linifolius</i>      | 899.76               | -                    | -                           |
| Brassicaceae | <i>Barbarea bracteosa</i>       | 268.95               | -                    | -                           |
| Brassicaceae | <i>Cakile maritima</i>          | 1383.87              | 666.4                | Lysák <i>et al.</i> 2009    |
| Brassicaceae | <i>Calepina irregularis</i>     | 254.28               | 205.8                | Lysák <i>et al.</i> 2009    |
| Brassicaceae | <i>Capsella bursa-pastoris</i>  | 420.54               | 392                  | Lysák <i>et al.</i> 2009    |
| Brassicaceae | <i>Cardamine hirsuta</i>        | 489                  | 224.42               | Johnston <i>et al.</i> 2005 |
| Brassicaceae | <i>Caulanthus amplexicaulis</i> | 484.11               | 369.46               | Johnston <i>et al.</i> 2005 |
| Brassicaceae | <i>Chorisporea tenella</i>      | 366.75               | 343                  | Lysák <i>et al.</i> 2009    |
| Brassicaceae | <i>Cochlearia officinalis</i>   | -                    | 735                  | Lysák <i>et al.</i> 2009    |
| Brassicaceae | <i>Crambe hispanica</i>         | 660.15               | -                    | -                           |
| Brassicaceae | <i>Descurainia pinnata</i>      | 371.64               | -                    | -                           |
| Brassicaceae | <i>Descurainia sophioides</i>   | 195.6                | -                    | -                           |
| Brassicaceae | <i>Diptychocarpus strictus</i>  | 557.46               | -                    | -                           |
| Brassicaceae | <i>Eruca vesicaria</i>          | 709.05               | -                    | -                           |
| Brassicaceae | <i>Erysimum cheiranthoides</i>  | -                    | 813.4                | Lysák <i>et al.</i> 2009    |
| Brassicaceae | <i>Euclidium syriacum</i>       | 298.29               | 264.6                | Lysák <i>et al.</i> 2009    |
| Brassicaceae | <i>Farsetia aegyptia</i>        | 2004.9               | -                    | -                           |
| Brassicaceae | <i>Goldbachia laevigata</i>     | 547.68               | -                    | -                           |
| Brassicaceae | <i>Guillenia lasiophylla</i>    | 621.03               | 376.32               | Johnston <i>et al.</i> 2005 |
| Brassicaceae | <i>Hesperis matronalis</i>      | 3261.63              | 3724                 | Kubešová <i>et al.</i> 2010 |
| Brassicaceae | <i>Hirschfeldia incana</i>      | 552.57               | 509.6                | Lysák <i>et al.</i> 2009    |
| Brassicaceae | <i>Iberis amara</i>             | 831.3                | -                    | -                           |
| Brassicaceae | <i>Isatis lusitanica</i>        | 381.42               | -                    | -                           |
| Brassicaceae | <i>Isatis tinctoria</i>         | 616.14               | -                    | -                           |
| Brassicaceae | <i>Lepidium ruderae</i>         | 371.64               | -                    | -                           |
| Brassicaceae | <i>Lepidium sativum</i>         | 591.69               | 570.36               | Johnston <i>et al.</i> 2005 |
| Brassicaceae | <i>Lobularia maritima</i>       | 312.96               | -                    | -                           |
| Brassicaceae | <i>Lunaria annua</i>            | 498.78               | -                    | -                           |
| Brassicaceae | <i>Malcomia maritima</i>        | 312.96               | -                    | -                           |
| Brassicaceae | <i>Matthiola longipetala</i>    | 1599.03              | -                    | -                           |
| Brassicaceae | <i>Myagrum perfoliatum</i>      | 352.08               | 284.2                | Lysák <i>et al.</i> 2009    |

|              |                                   |         |        |                                            |
|--------------|-----------------------------------|---------|--------|--------------------------------------------|
| Brassicaceae | <i>Nasturtium officinale</i>      | 430.32  | 372.4  | Morozowska <i>et al.</i> 2010              |
| Brassicaceae | <i>Olimoarabidopsis pumila</i>    | 410.76  | 343    | Lysák <i>et al.</i> 2009                   |
| Brassicaceae | <i>Physaria acutifolia</i>        | 2322.75 | -      | -                                          |
| Brassicaceae | <i>Sisymbrium leucocladum</i>     | 498.78  | -      | -                                          |
| Brassicaceae | <i>Psychine stylosa</i>           | 518.34  | 499.8  | Lysák <i>et al.</i> 2009                   |
| Brassicaceae | <i>Rorippa islandica</i>          | 567.24  | -      | -                                          |
| Brassicaceae | <i>Schizopetalum walkeri</i>      | 1775.07 | -      | -                                          |
| Brassicaceae | <i>Sinapis alba</i>               | 557.46  | 490    | Bennett MD, Smith JB, Heslop-Harrison 1982 |
| Brassicaceae | <i>Sisymbrium brassiciforme</i>   | -       | -      | -                                          |
| Brassicaceae | <i>Brassicaceae sp</i>            | 1036.68 | -      | -                                          |
| Brassicaceae | <i>Streptanthus arizonicus</i>    | 1090.47 | -      | -                                          |
| Brassicaceae | <i>Streptanthus heterophyllus</i> | 748.17  | -      | -                                          |
| Brassicaceae | <i>Teesdalia nudicaulis</i>       | 557.46  | 597.8  | Lysák <i>et al.</i> 2009                   |
| Brassicaceae | <i>Thlaspi arvense</i>            | 205.38  | 509.6  | Lysák <i>et al.</i> 2009                   |
| Brassicaceae | <i>Turritis glabra</i>            | 919.32  | 235.2  | Lysák <i>et al.</i> 2009                   |
| Capparaceae  | <i>Boscia sp</i>                  | 410.76  | -      | -                                          |
| Capparaceae  | <i>Cadaba natalensis</i>          | 259.17  | -      | -                                          |
| Capparaceae  | <i>Capparis fascicularis</i>      | 1139.37 | -      | -                                          |
| Capparaceae  | <i>Capparaceae sp</i>             | 611.25  | -      | -                                          |
| Cariaceae    | <i>Carica papaya</i>              | -       | 392    | Bennett <i>et al.</i> 1976                 |
| Cleomaceae   | <i>Cleome africana</i>            | 484.11  | -      | -                                          |
| Cleomaceae   | <i>Coalisina angustifolia</i>     | 342.3   | -      | -                                          |
| Cleomaceae   | <i>Cleome arabica</i>             | 464.55  | -      | -                                          |
| Cleomaceae   | <i>Polanisia sp</i>               | 709.05  | -      | -                                          |
| Cleomaceae   | <i>Coalisina paradoxa</i>         | 484.11  | -      | -                                          |
| Cleomaceae   | <i>Cleomaceae sp</i>              | 322.74  | -      | -                                          |
| Cleomaceae   | <i>Cleome violacea</i>            | 474.33  | -      | -                                          |
| Cleomaceae   | <i>Melidiscus giganteus</i>       | 420.54  | -      | -                                          |
| Cleomaceae   | <i>Arivela viscosa</i>            | 268.95  | -      | -                                          |
| Cleomaceae   | <i>Cleomella serrulata</i>        | -       | -      | -                                          |
| Cleomaceae   | <i>Gynandropsis gynandra</i>      | 1124.7  | -      | -                                          |
| Cleomaceae   | <i>Polanisia dodecandra</i>       | 733.5   | -      | -                                          |
| Cleomaceae   | <i>Polanisia graveolens</i>       | 723.72  | -      | -                                          |
| Cleomaceae   | <i>Polanisia trachysperma</i>     | 699.27  | -      | -                                          |
| Cleomaceae   | <i>Tarenaya hassleriana</i>       | 435.21  | 300.86 | Johnston <i>et al.</i> 2005                |
| Moringaceae  | <i>Moringa oleifera</i>           | 386.31  | -      | -                                          |
| Resadaceae   | <i>Ochradenus baccatus</i>        | 870.42  | -      | -                                          |
| Resadaceae   | <i>Reseda odorata</i>             | 498.78  | -      | -                                          |
