# Supplementary material
Source: publisher figshare collection journal article supplement (https://gsajournals.figshare.com/articles/dataset/_/14462430)
Supplement: Supplementary file 23 [file 1]

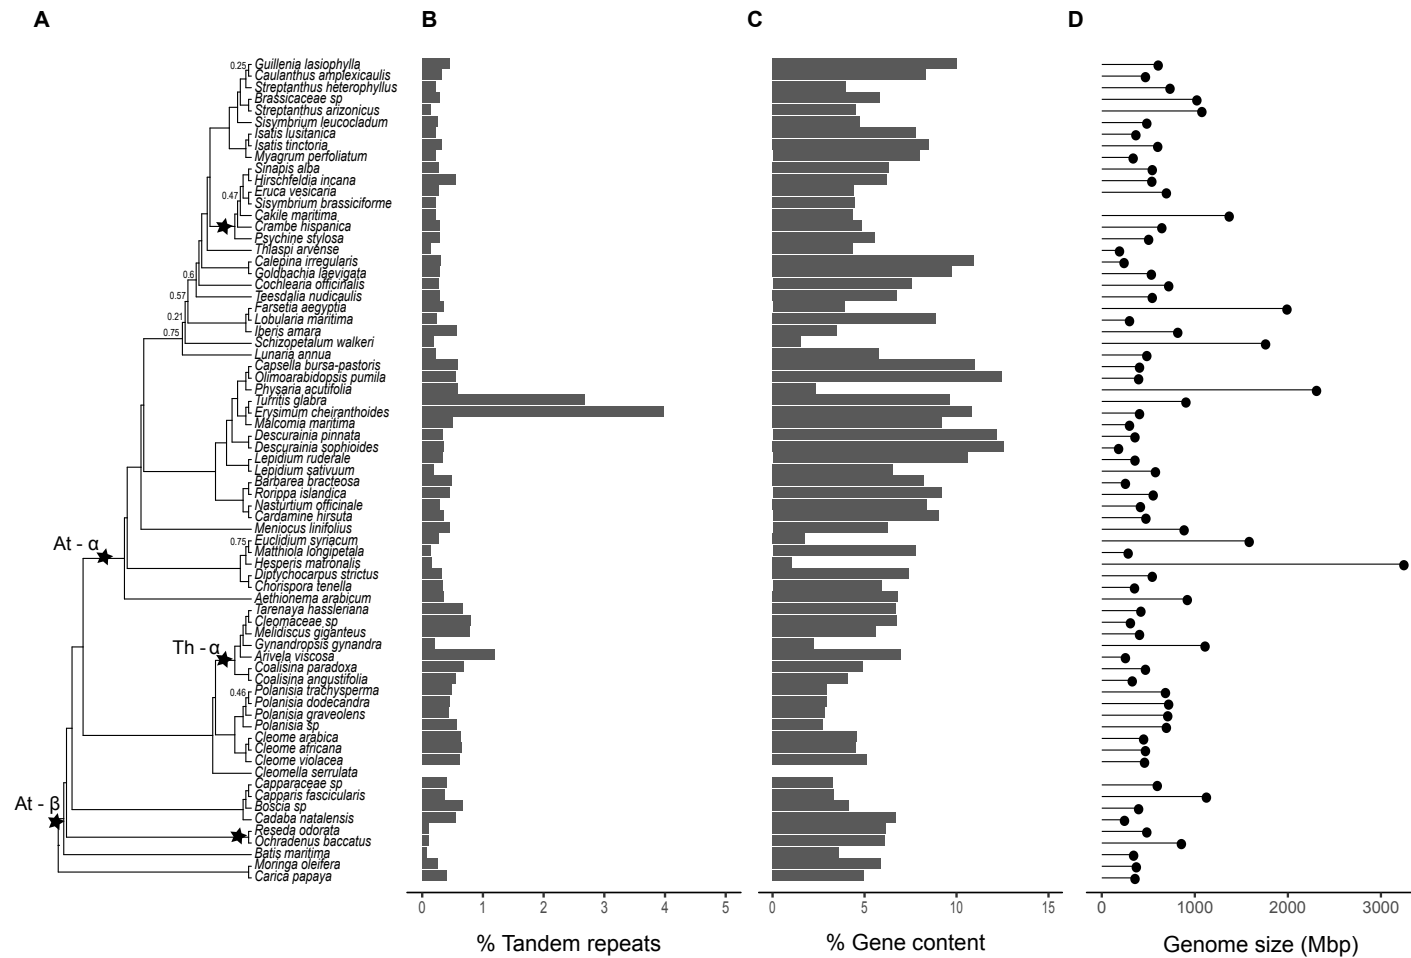

**Supplemental Figure 7.** Taxa sampled with corresponding tandem repeat and gene content. (A) Phylogeny with whole-genome duplications indicated by black stars. Support values are shown for those branched with less than 0.7 local posterior probability. (B) Percent annotated as tandem repeats, (C) percent annotated as gene content, and (D) genome size (Mbp).
